# Supplementary material for: Optical manipulation of sphingolipid biosynthesis using photoswitchable ceramides
Source: PubMed Central journal article supplement (PMC6386522; doi:10.7554/elife.43230), 2019-02-05

# Optical manipulation of sphingolipid biosynthesis using photoswitchable ceramides

Matthijs Kol<sup>§1</sup>, Ben Williams<sup>§2</sup>, Henry Toombs-Ruane<sup>2</sup>, Henri G. Franquelim<sup>3</sup>, Sergei Korneev<sup>1</sup>,  
Christian Schroeer<sup>1</sup>, Petra Schwille<sup>3</sup>, Dirk Trauner<sup>\*2,4</sup>, Joost C.M. Holthuis<sup>\*1,5</sup>, James Allen  
Frank<sup>\*2,6</sup>

<sup>1</sup>Molecular Cell Biology Division, Department of Biology/Chemistry, University of Osnabrück, 49076 Osnabrück, Germany. <sup>2</sup>Department of Chemistry and Center for Integrated Protein Science, Ludwig Maximilians University Munich, Butenandtstraße 5-13, 81377 Munich, Germany. <sup>3</sup>Department of Cellular and Molecular Biophysics, Max Planck Institute of Biochemistry, Am Klopferspitz 18, 82152 Martinsried, Germany. <sup>4</sup>Department of Chemistry, New York University, 100 Washington Square East, New York, NY 10003-6699, USA. <sup>5</sup>Membrane Biochemistry & Biophysics, Bijvoet Center and Institute of Biomembranes, Utrecht University, 3584 CH Utrecht, the Netherlands. <sup>6</sup>*present address*: The Vollum Institute, Oregon Health & Science University, 3181 S.W. Sam Jackson Park Rd., Portland, Oregon 97239, USA

<sup>§</sup>these authors contributed equally to this work

<sup>\*</sup>co-corresponding authors

James Allen Frank – frankja@ohsu.edu

Joost C.M. Holthuis - joost.holthuis@biologie.uni-osnabrueck.de

Dirk Trauner – dirktrauner@nyu.edu

## Supplementary File 1 - NMR Spectra

### <sup>1</sup>H NMR of 1-(but-3-yn-1-yl)-4-nitrobenzene (2)

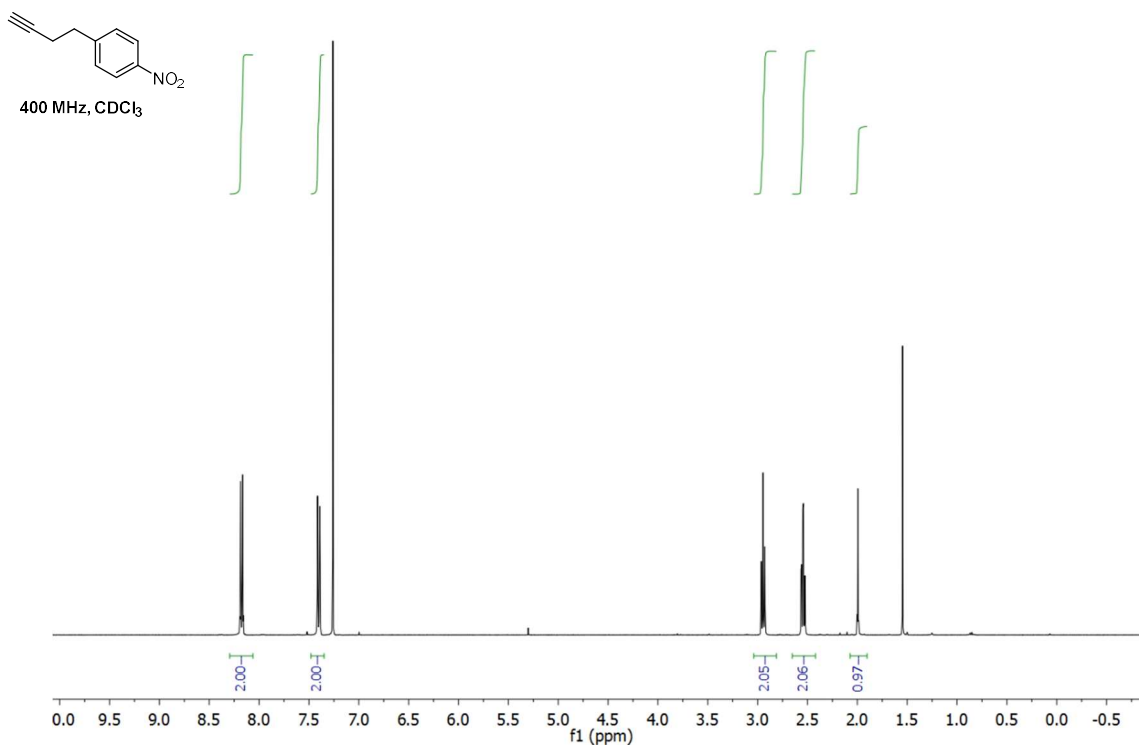

### <sup>13</sup>C NMR of 1-(but-3-yn-1-yl)-4-nitrobenzene (2)

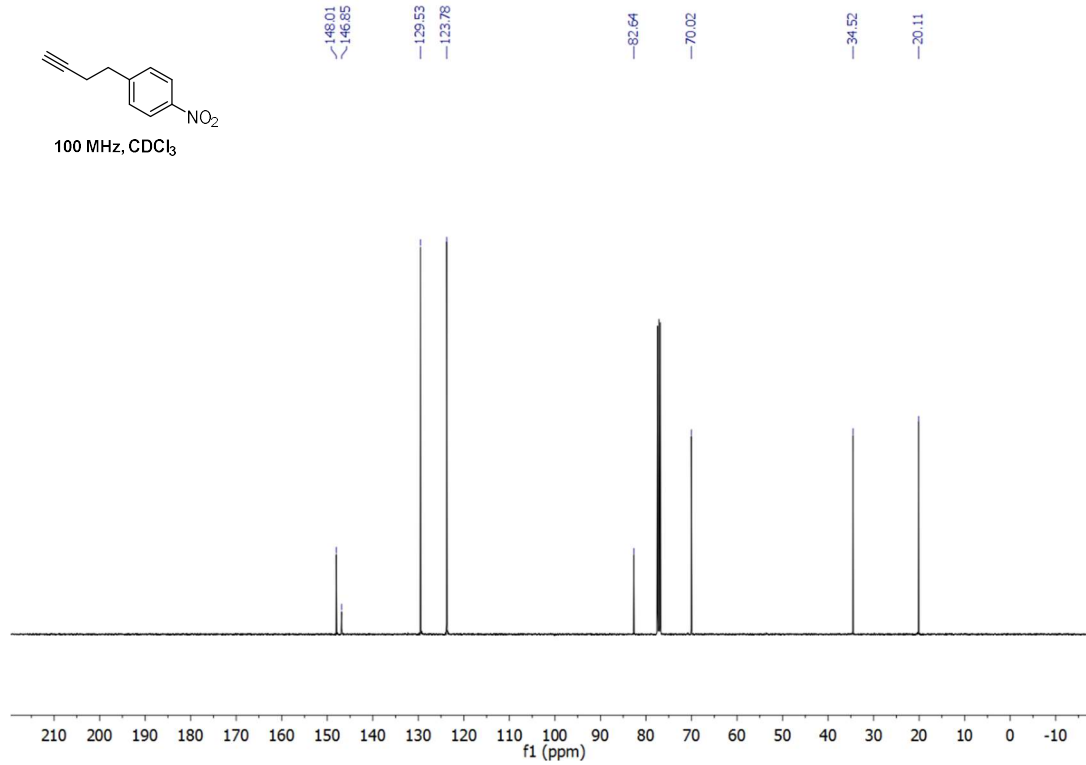

### <sup>1</sup>H NMR of 4-(but-3-yn-1-yl)aniline (3)

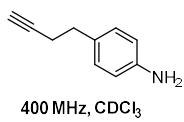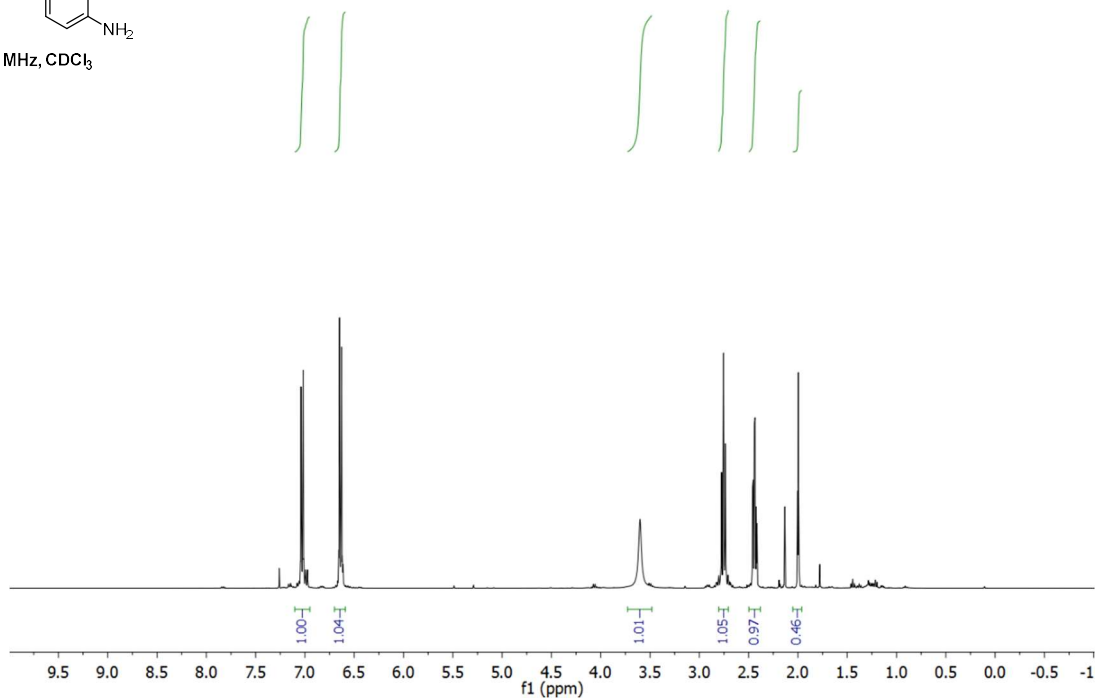

### <sup>13</sup>C NMR of 4-(but-3-yn-1-yl)aniline (3)

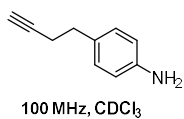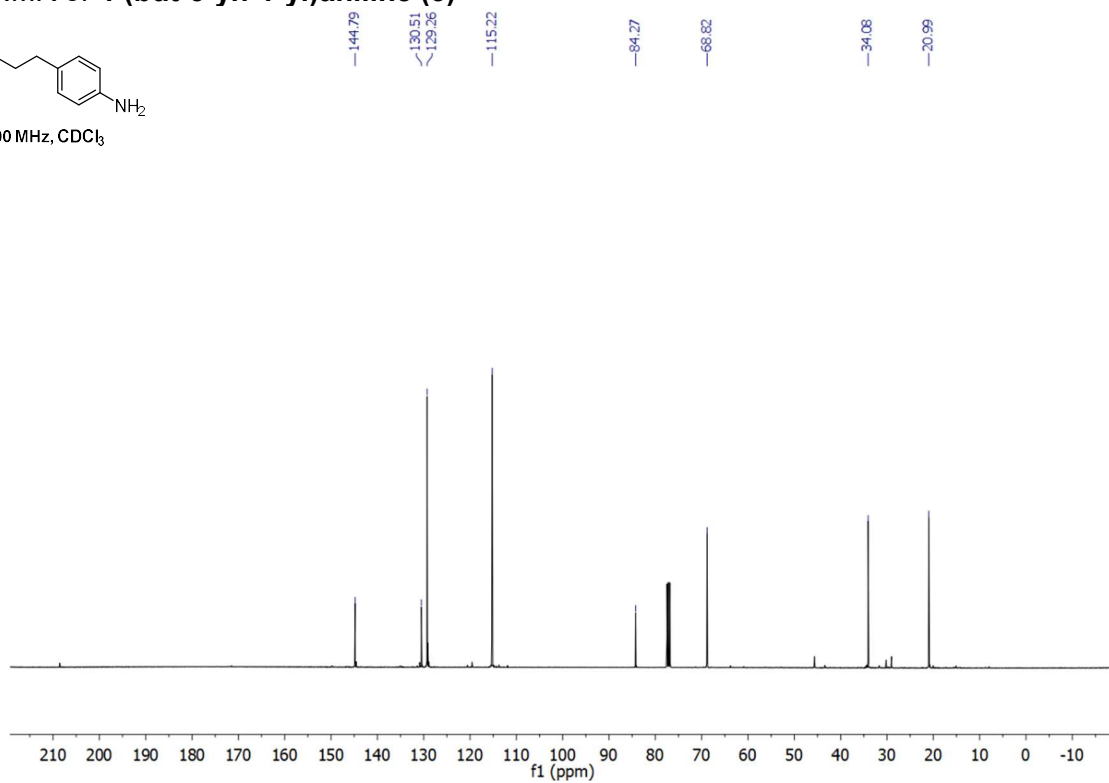

**<sup>1</sup>H NMR of 4-(4-((4-(but-3-yn-1-yl)phenyl)diazenyl)phenyl)butanoic acid (cFAAzo-4)**

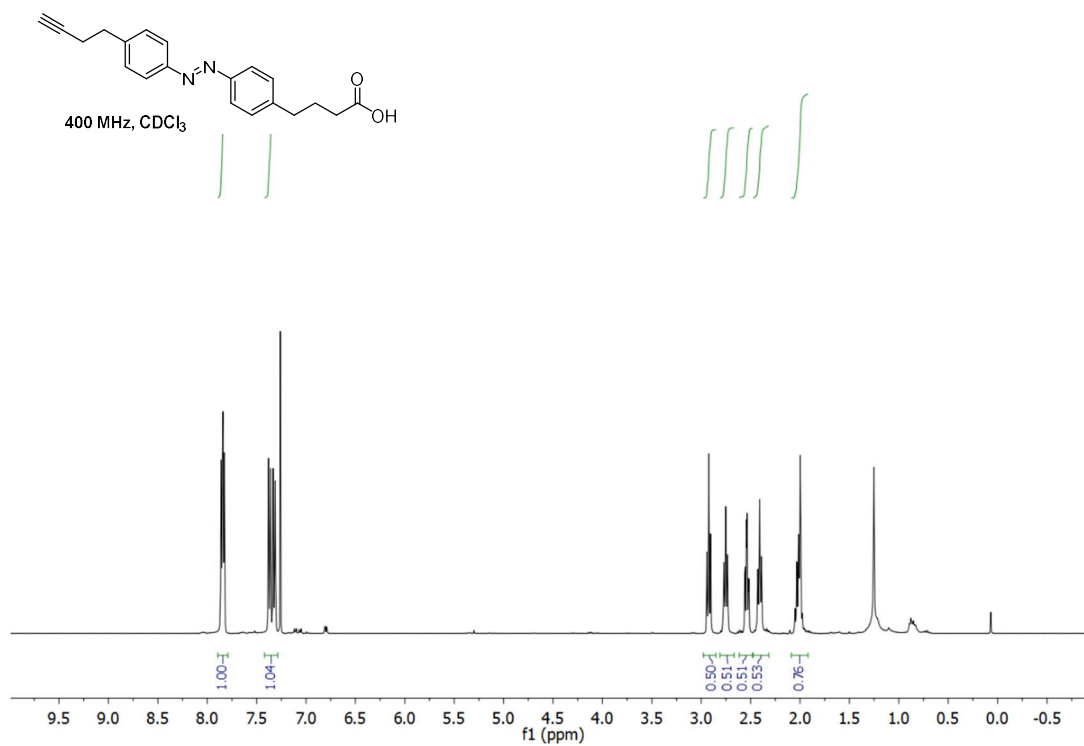

**<sup>13</sup>C NMR of 4-(4-((4-(but-3-yn-1-yl)phenyl)diazenyl)phenyl)butanoic acid (cFAAzo-4)**

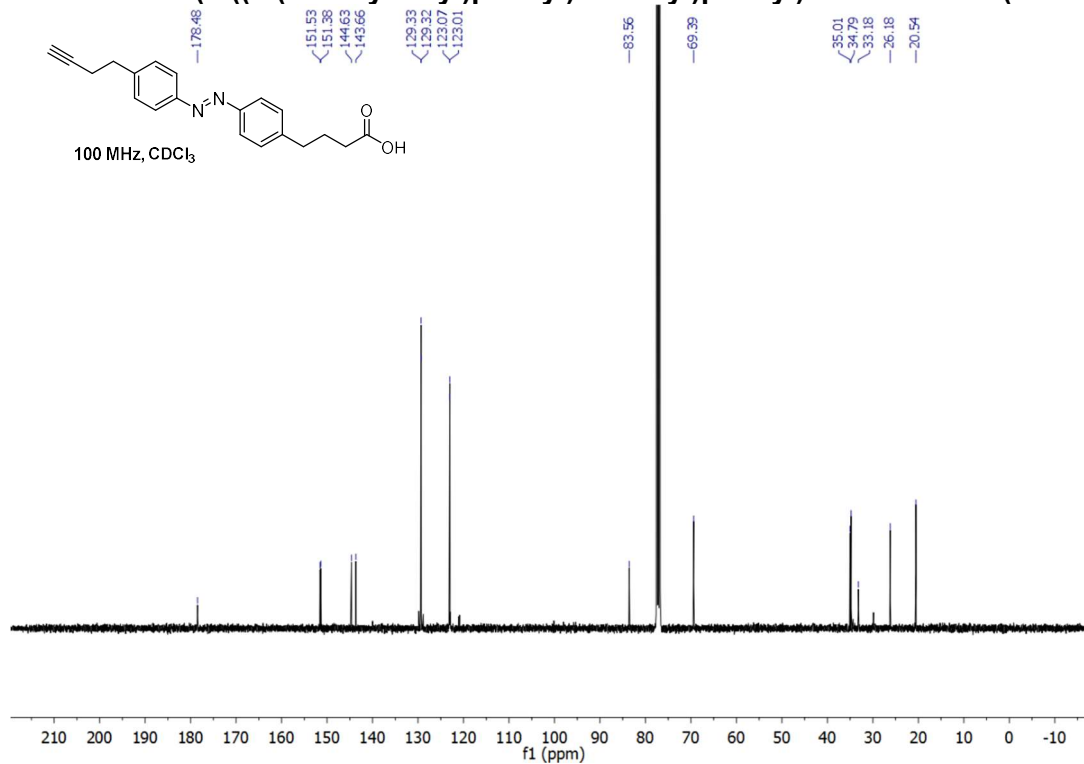

<sup>1</sup>H NMR of 4-(4-(4-(but-3-yn-1-yl)phenyl)diazenyl)phenyl)-N-((2S,3R,E)-1,3-dihydroxyoctadec-4-en-2-yl)butanamide (caCer-1)

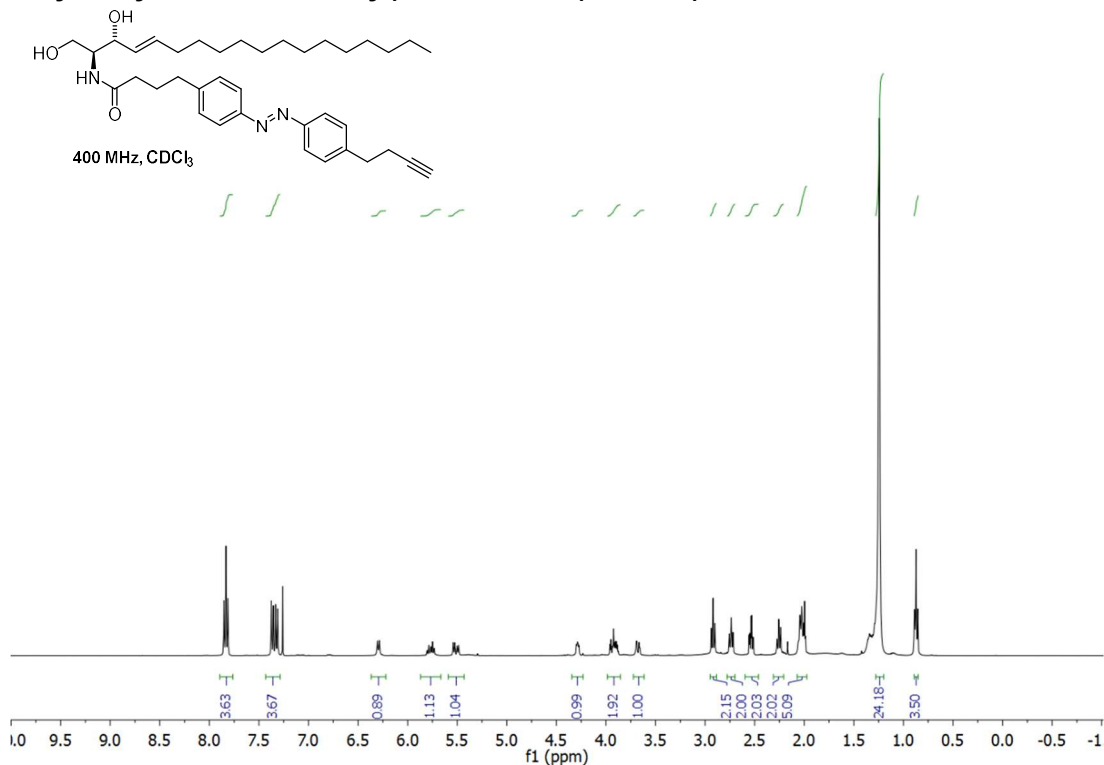

<sup>13</sup>C NMR of 4-(4-(4-(but-3-yn-1-yl)phenyl)diazenyl)phenyl)-N-((2S,3R,E)-1,3-dihydroxyoctadec-4-en-2-yl)butanamide (caCer-1)

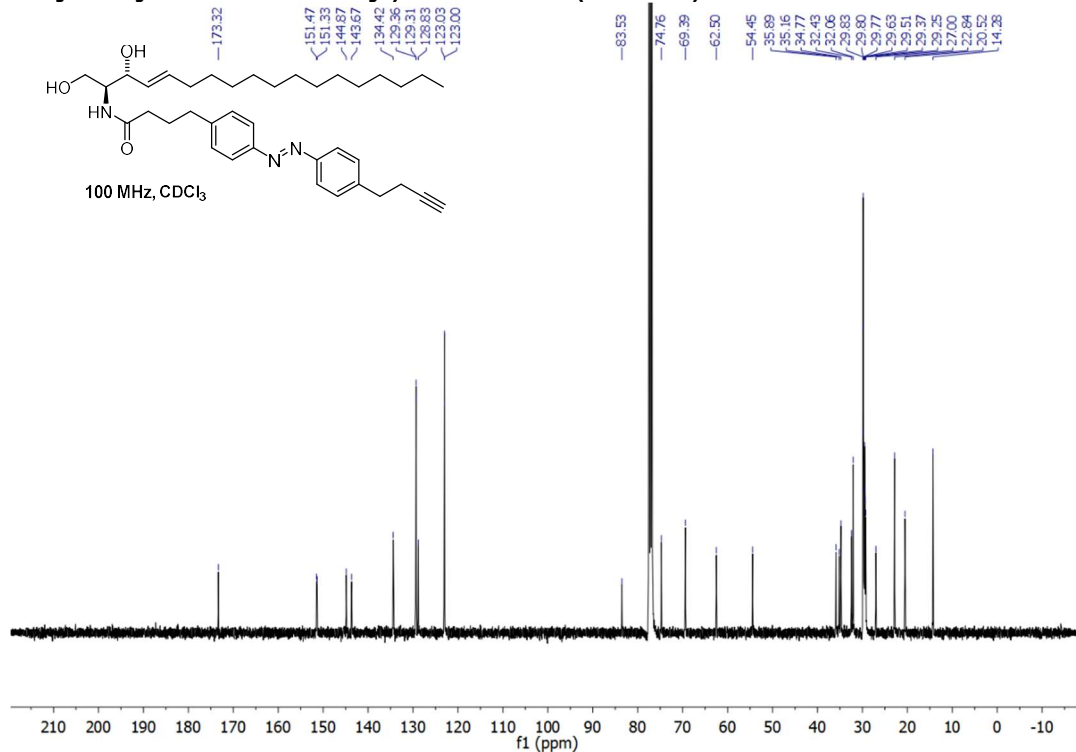

### <sup>1</sup>H NMR of 4-((4-(but-3-yn-1-yl)phenyl)diazenyl)benzoic acid (cFAAzo-1)

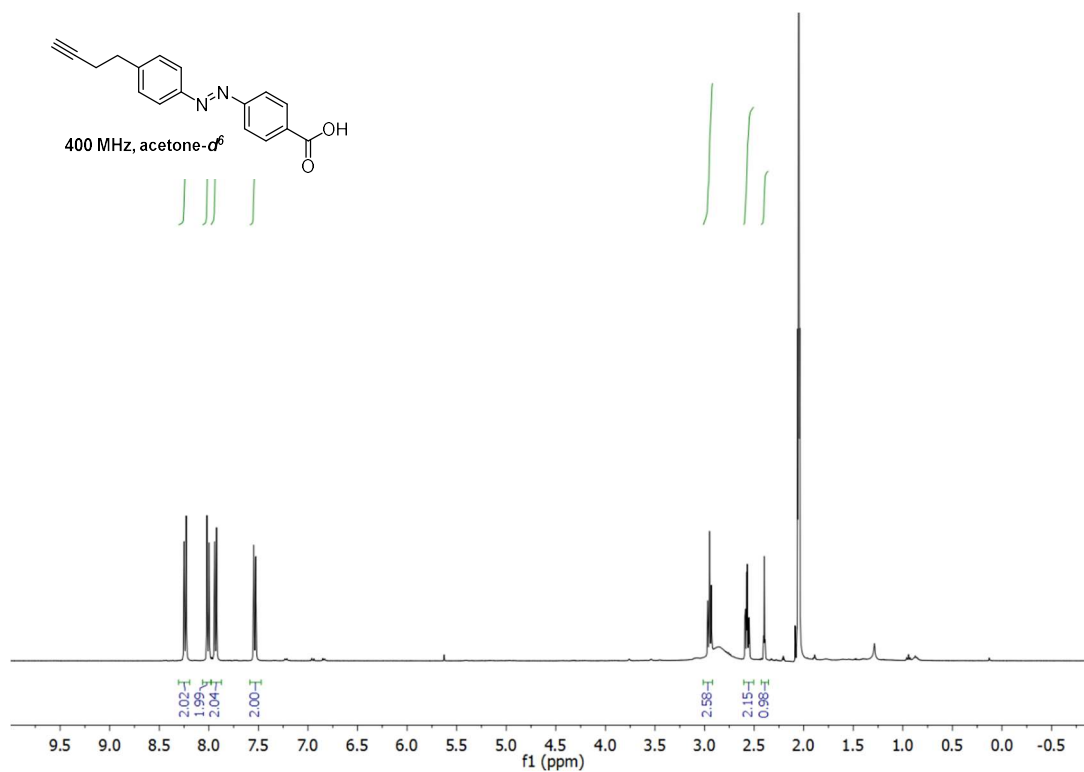

### <sup>13</sup>C NMR of 4-((4-(but-3-yn-1-yl)phenyl)diazenyl)benzoic acid (cFAAzo-1)

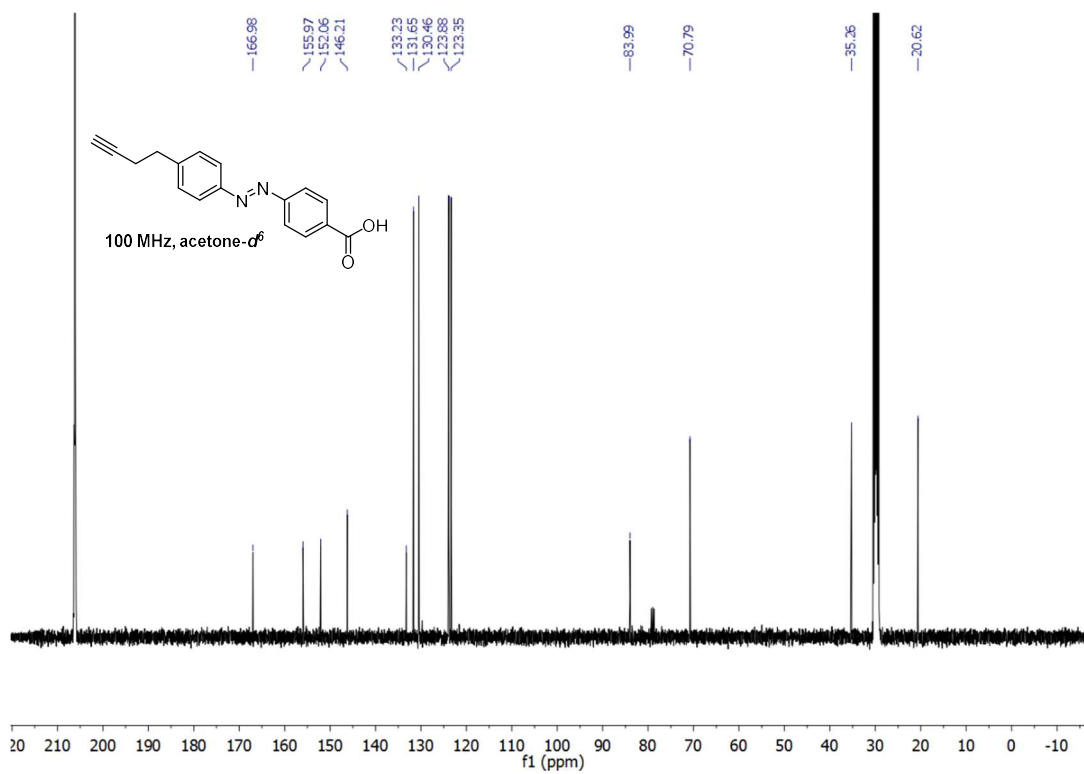

**<sup>1</sup>H NMR of 4-(4-(but-3-yn-1-yl)phenyl)diazenyl-N-((2S,3R,E)-1,3-dihydroxyoctadec-4-en-2-yl)benzamide (caCer-2)**

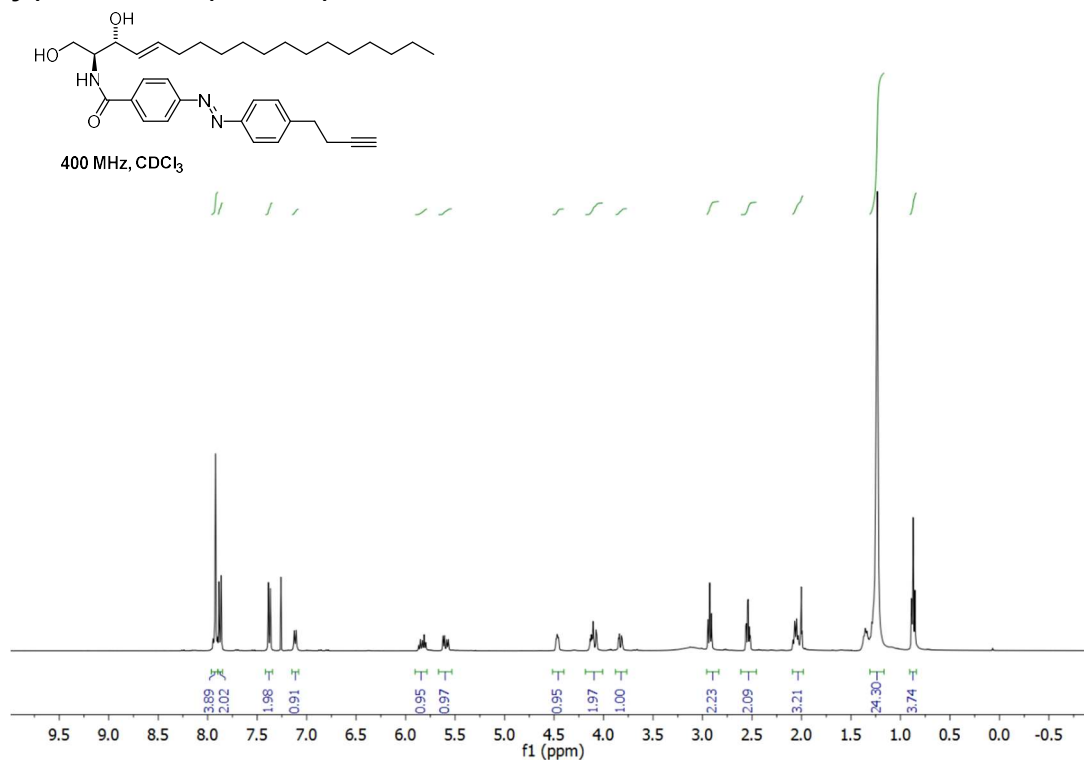

**<sup>13</sup>C NMR of 4-(4-(but-3-yn-1-yl)phenyl)diazenyl-N-((2S,3R,E)-1,3-dihydroxyoctadec-4-en-2-yl)benzamide (caCer-2)**

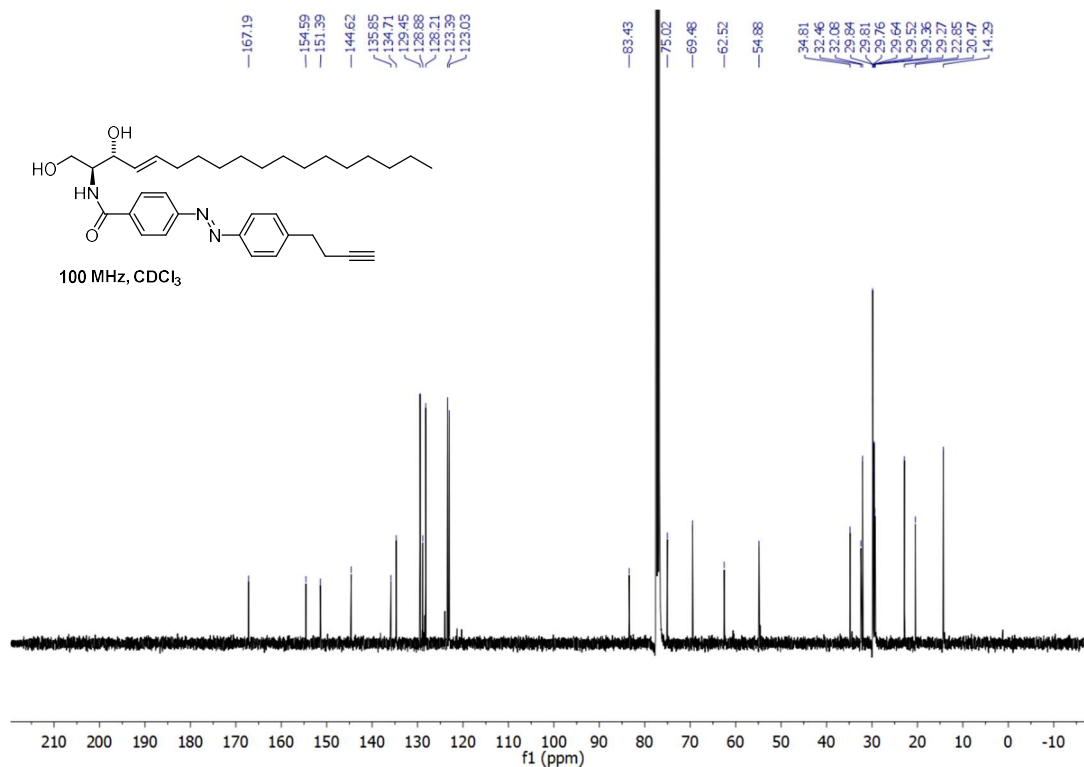

# <sup>1</sup>H NMR of pentadec-7-yn-1-ol (S1)

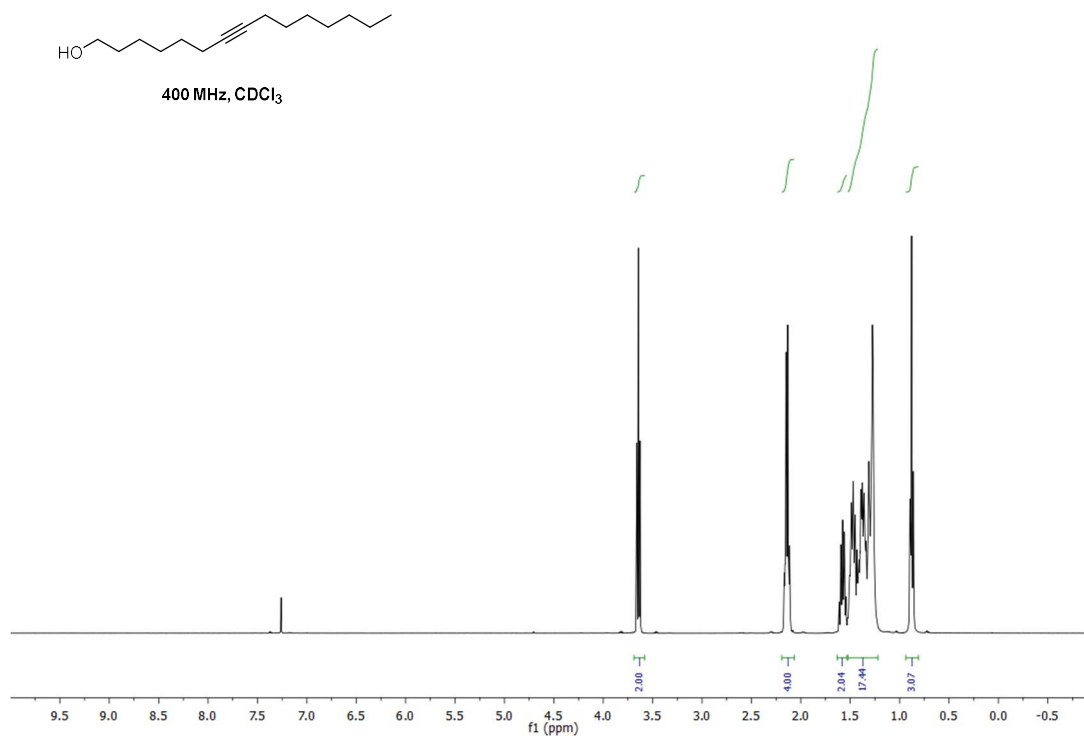

# <sup>13</sup>C NMR of pentadec-7-yn-1-ol (S1)

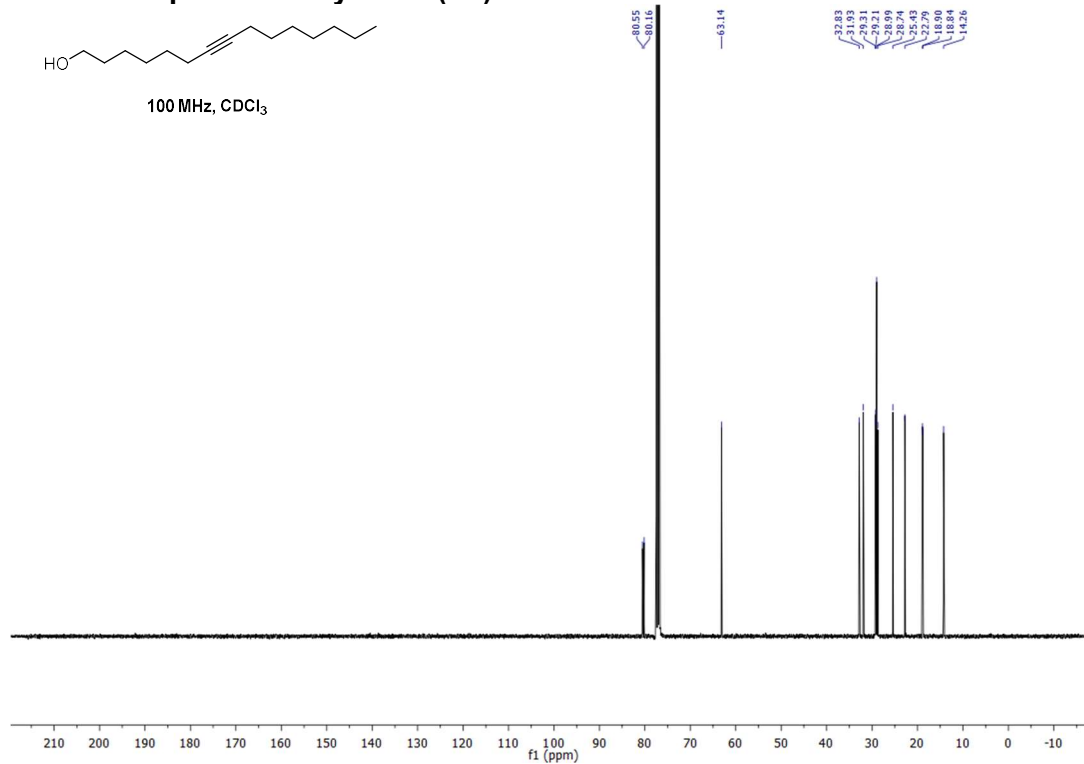



### <sup>1</sup>H NMR of pentadec-14-yn-1-ol (S2)

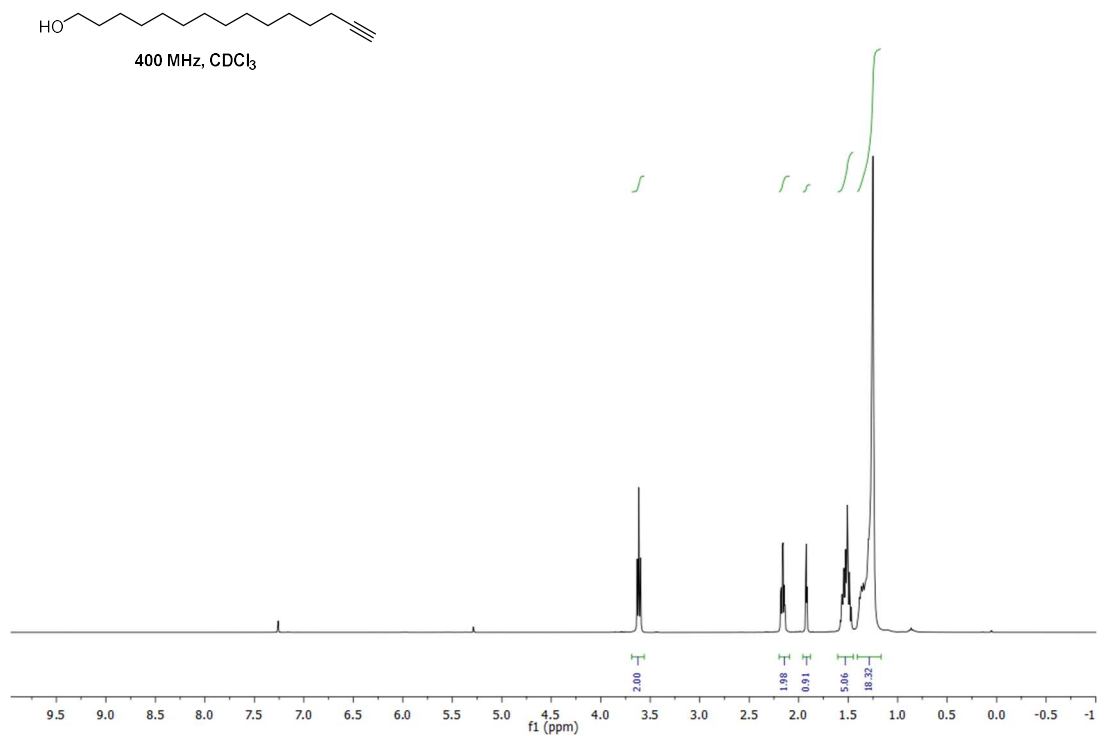

### <sup>1</sup>H NMR of pentadec-14-ynoic acid (4)

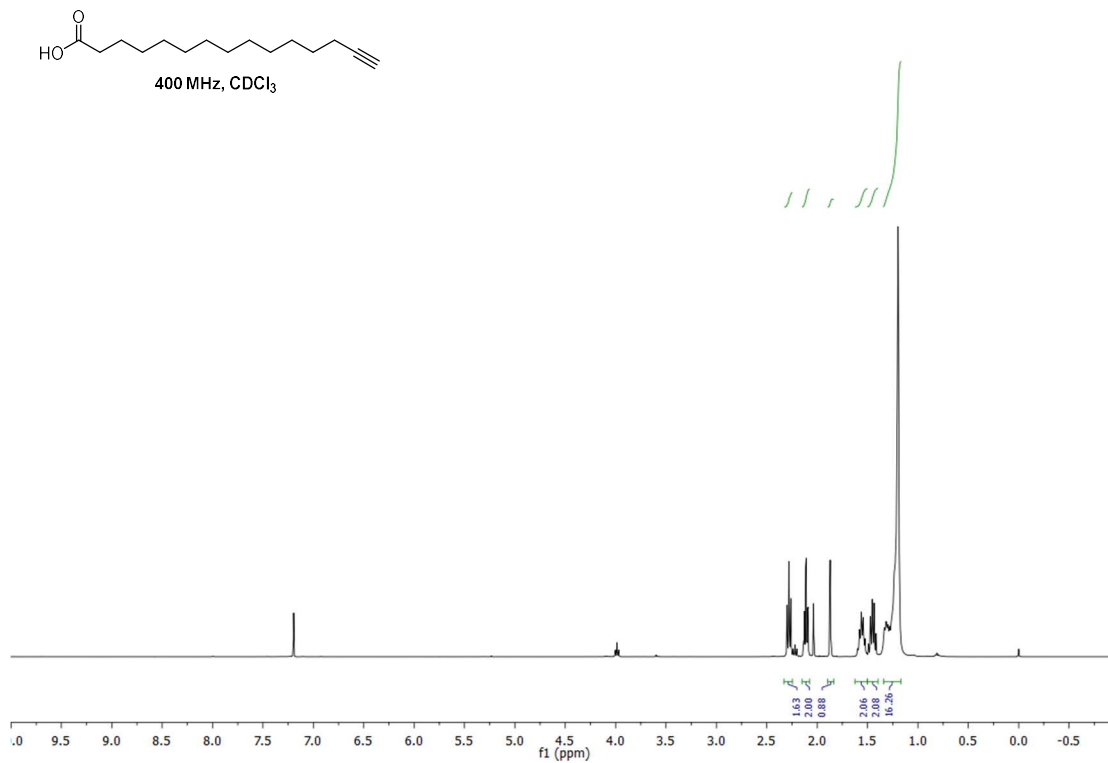

# <sup>1</sup>H NMR of 4-((4-propylphenyl)diazenyl)benzyl alcohol (5)

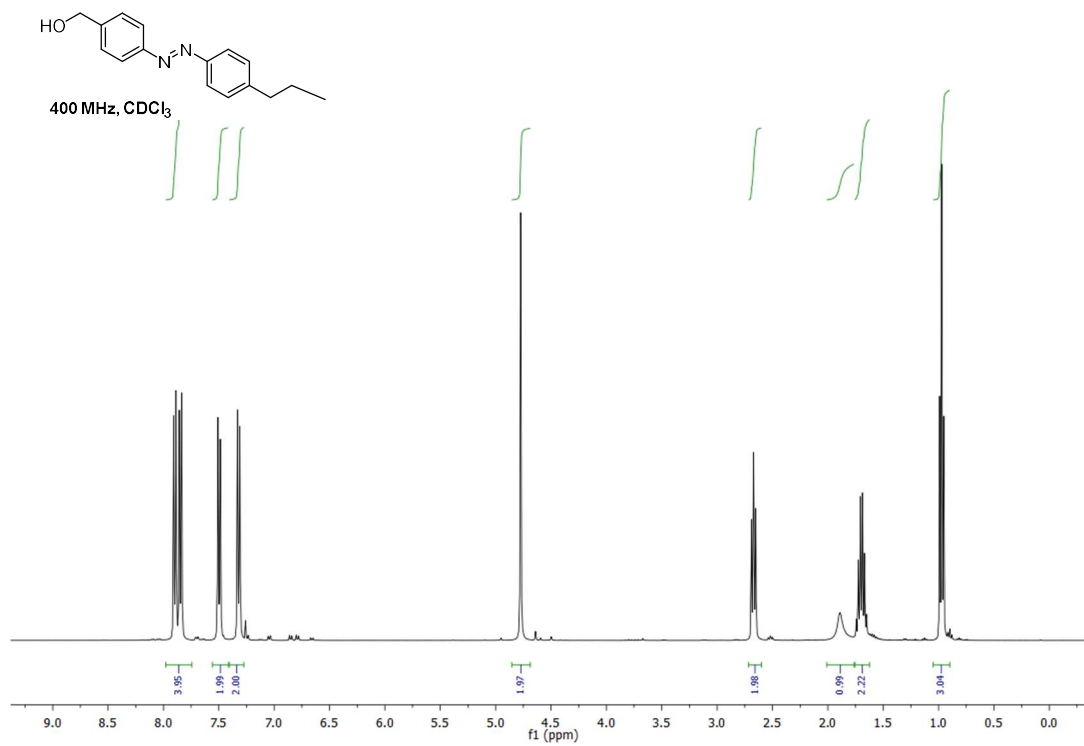

# <sup>13</sup>C NMR of 4-((4-propylphenyl)diazenyl)benzyl alcohol (5)

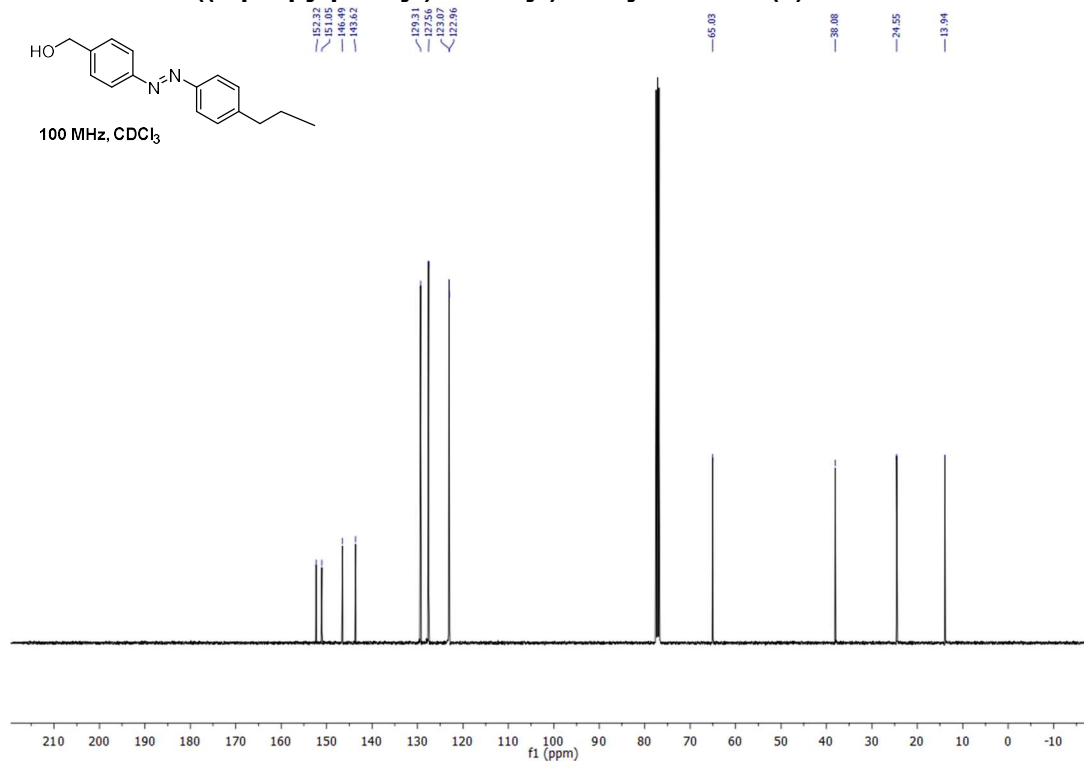

# <sup>1</sup>H NMR of 4-((4-propylphenyl)diazenyl)benzaldehyde (6)

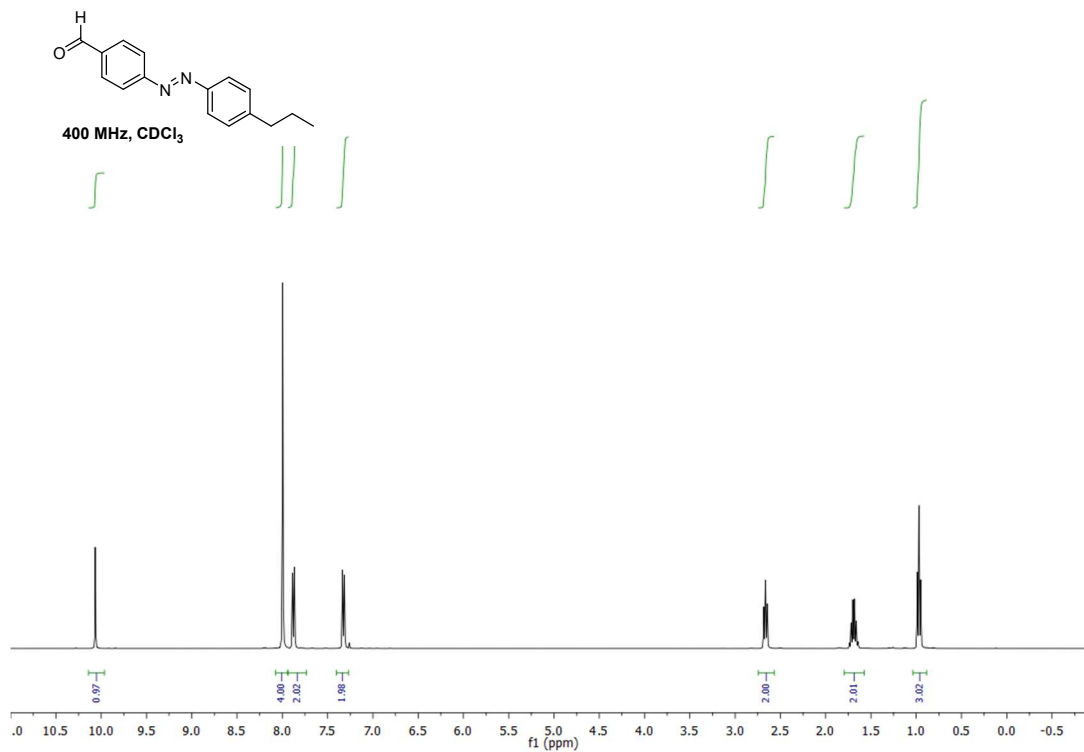

# <sup>13</sup>C NMR of 4-((4-propylphenyl)diazenyl)benzaldehyde (6)

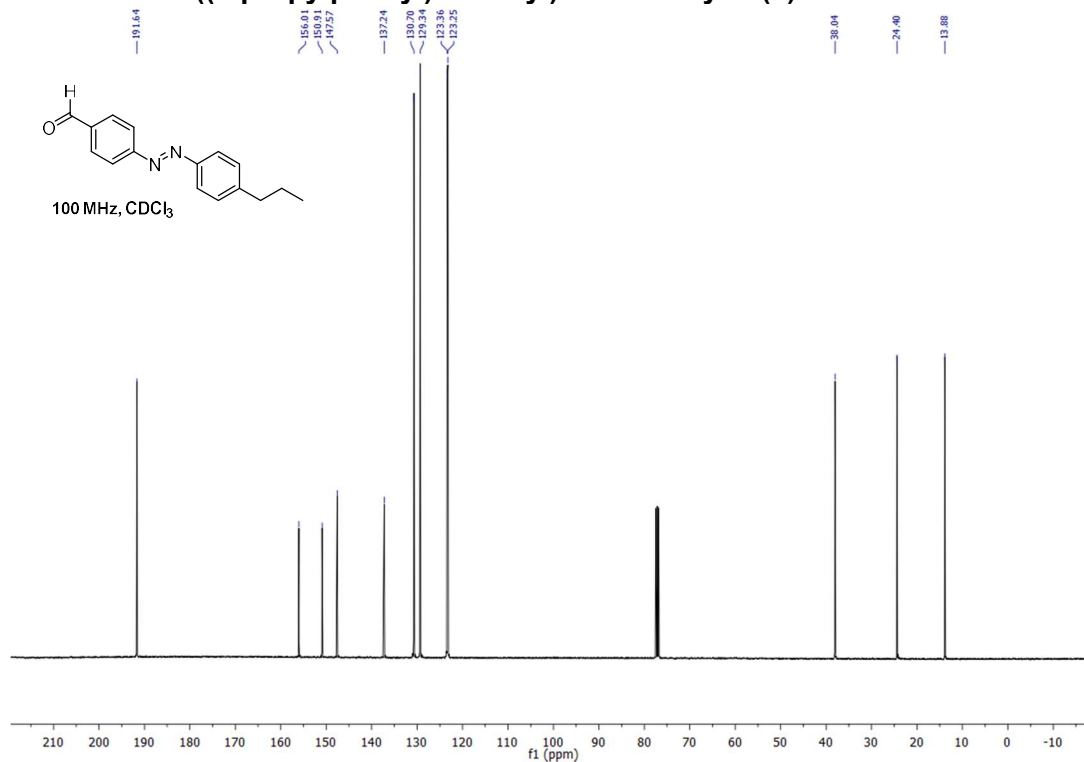

# <sup>1</sup>H NMR of 1-(4-propylphenyl)-2-(4-vinylphenyl)diazene (7)

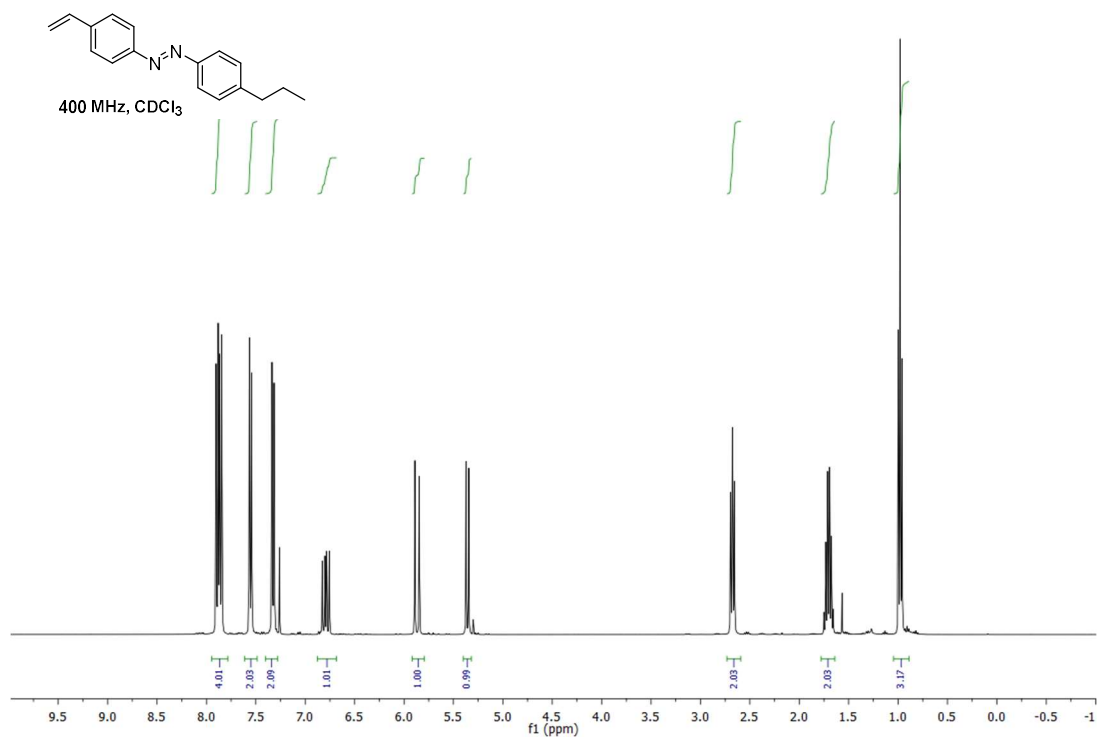

# <sup>13</sup>C NMR of 1-(4-propylphenyl)-2-(4-vinylphenyl)diazene (7)

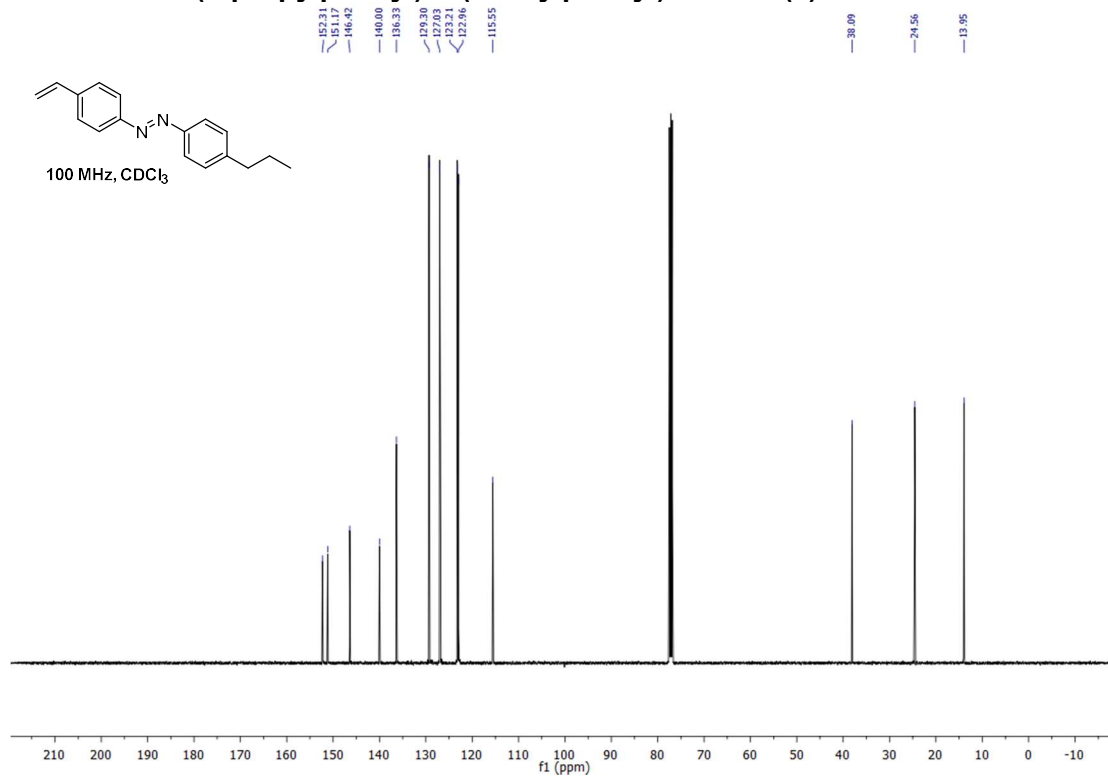

### <sup>1</sup>H NMR of 4-iodo-4'-methylazobenzene (S3)

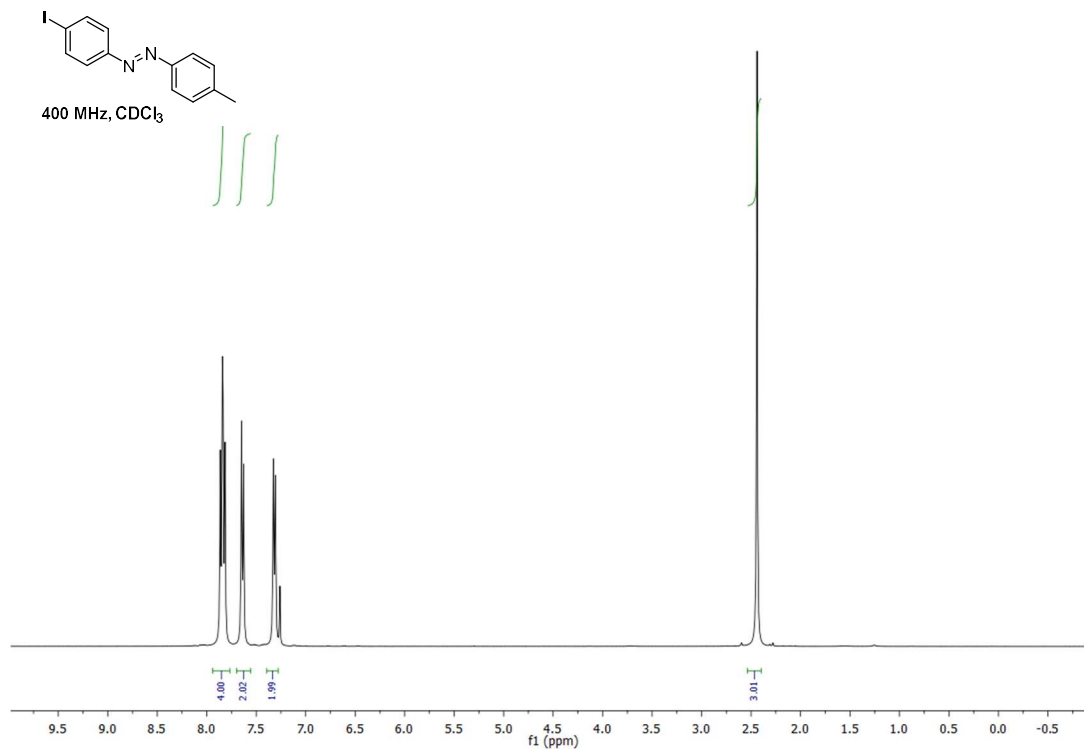

### <sup>13</sup>C NMR of 4-iodo-4'-methylazobenzene (S3)

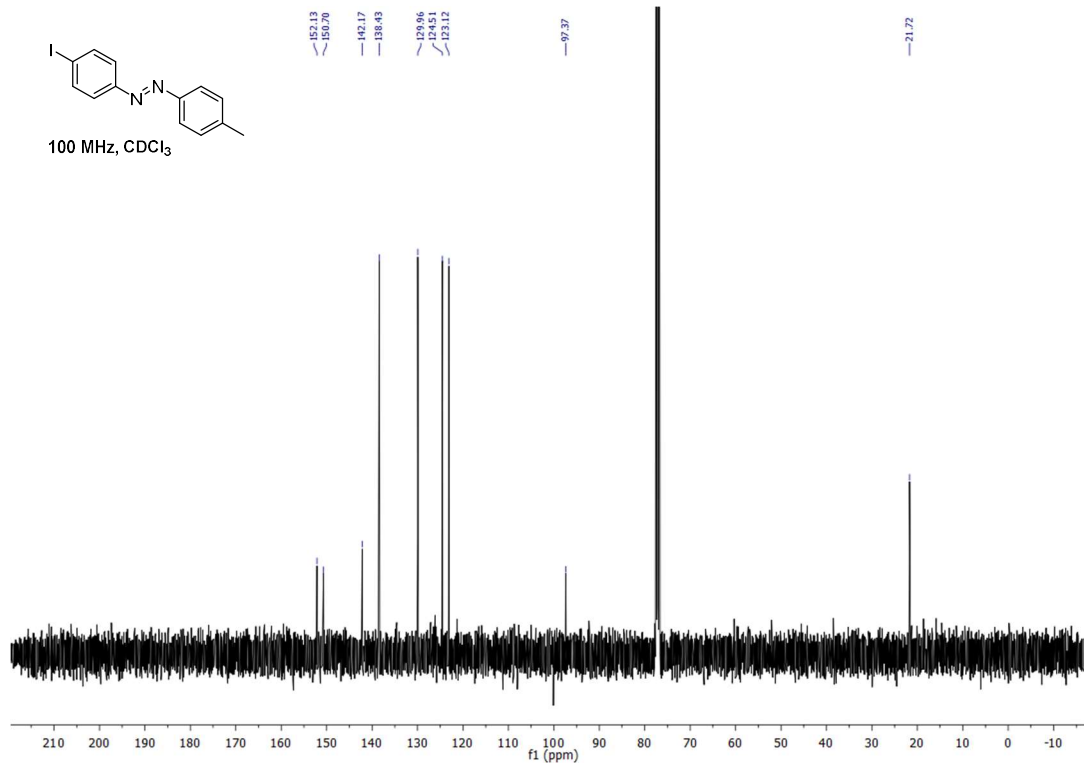

### <sup>1</sup>H NMR of 3-(4-(*p*-tolyl diazenyl)phenyl)propanal (S4)

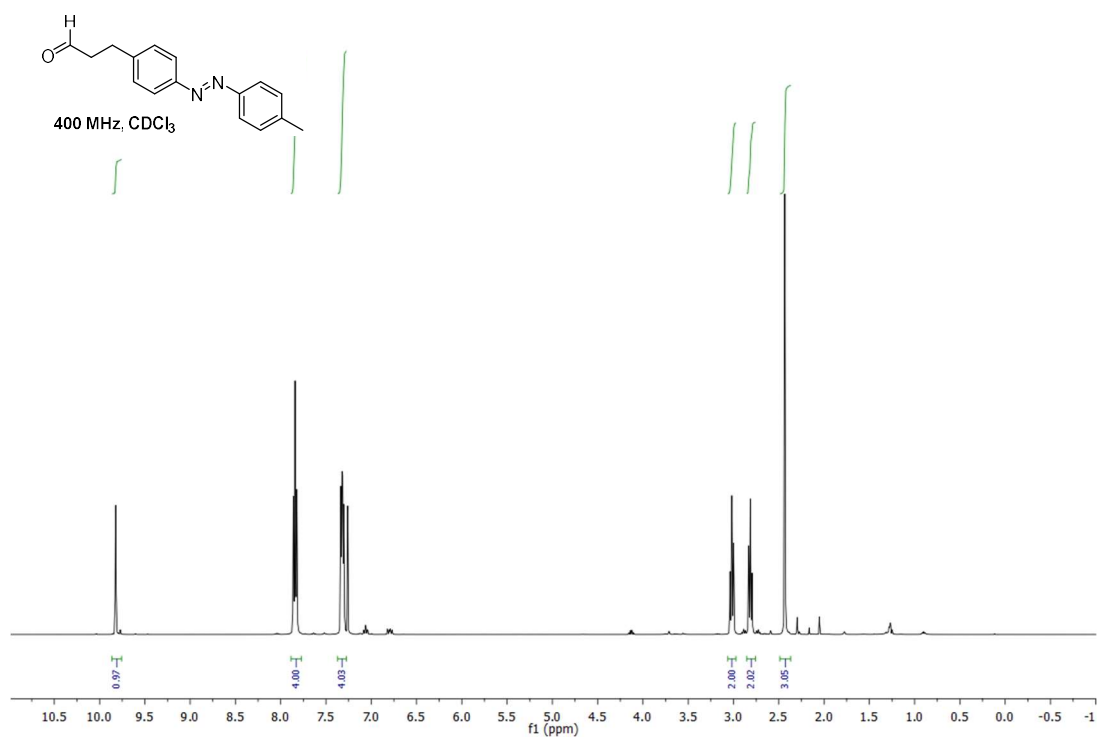

### <sup>13</sup>C NMR of 3-(4-(*p*-tolyl diazenyl)phenyl)propanal (S4)

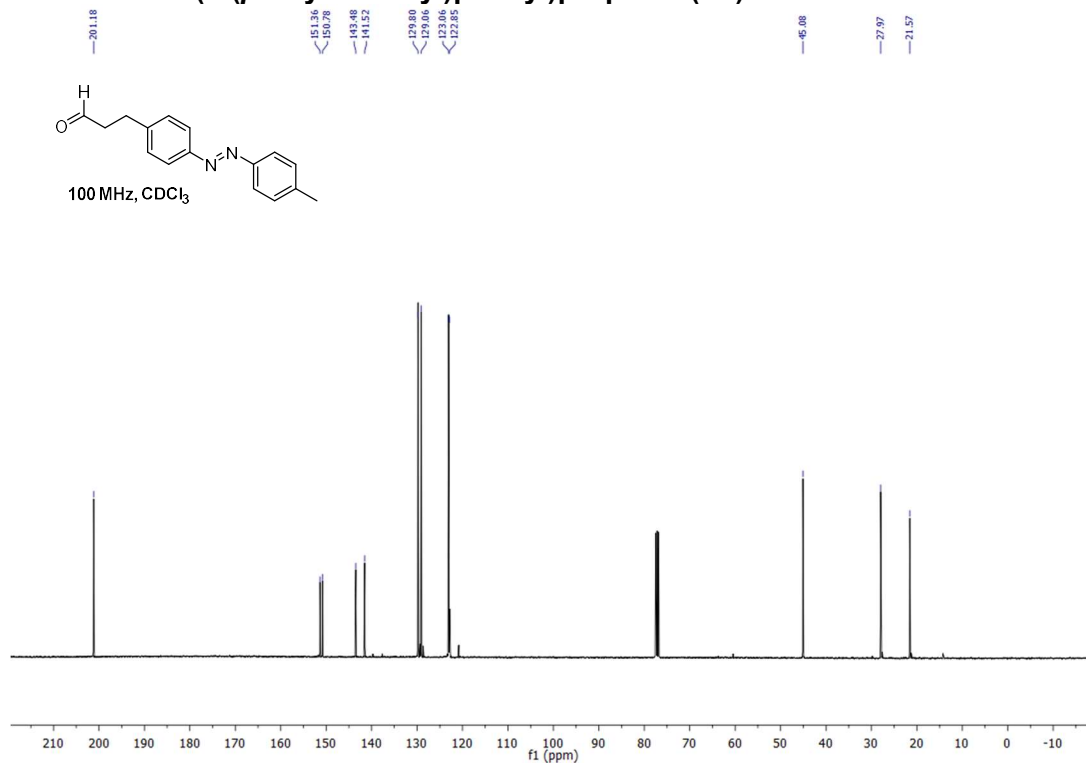

# <sup>1</sup>H NMR of 1-(4-(but-3-en-1-yl)phenyl)-2-(p-tolyl)diazene (S5)

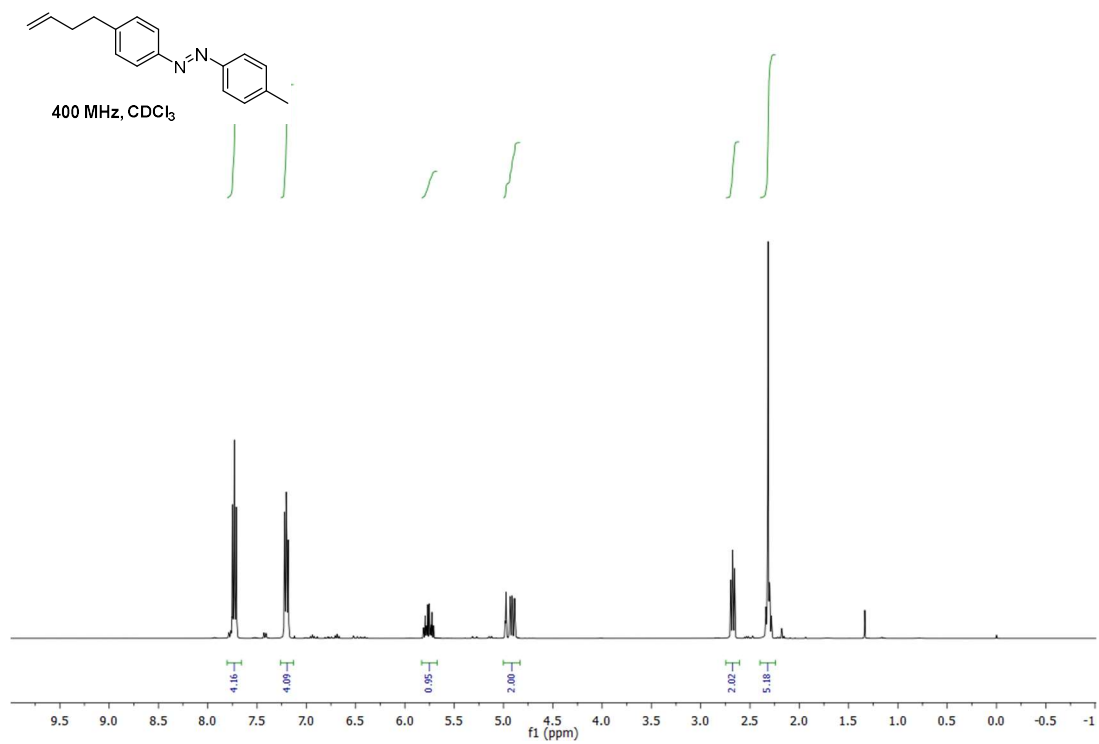

# <sup>13</sup>C NMR of 1-(4-(but-3-en-1-yl)phenyl)-2-(p-tolyl)diazene (S5)

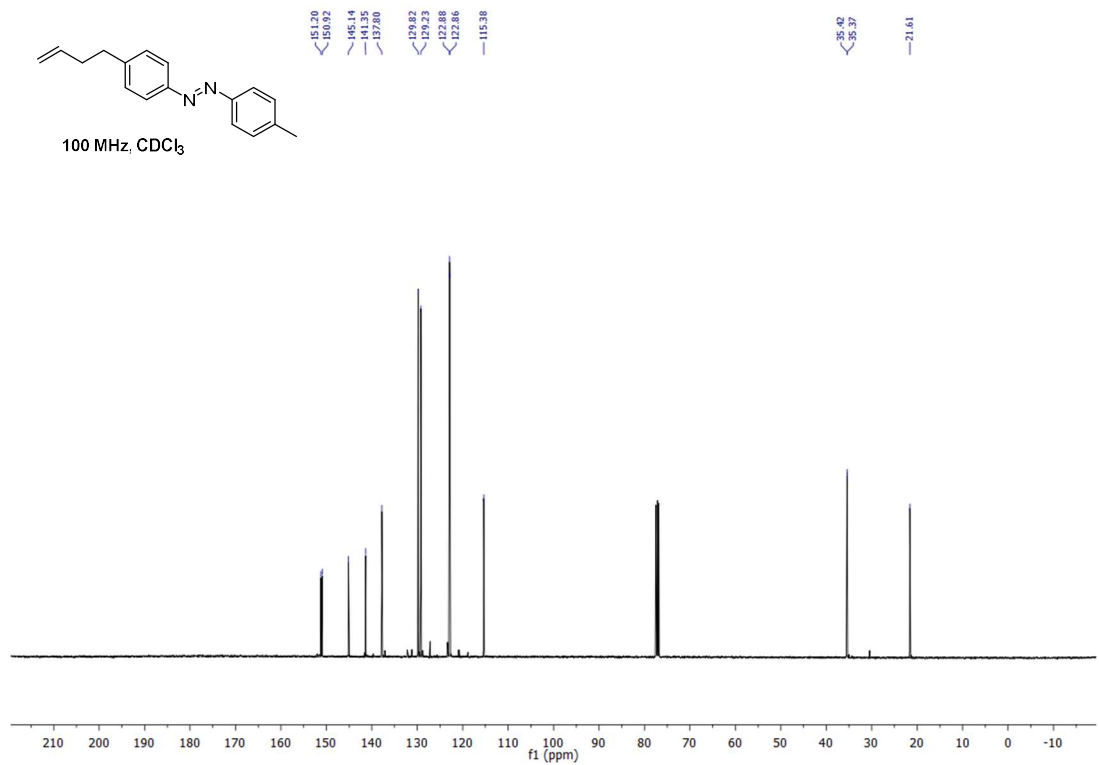

<sup>1</sup>H NMR of *N*-Boc-(*R*)-1-((*S*)-2,2-dimethyloxazolidin-4-yl)prop-2-en-1-ol (8)

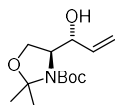

400 MHz, C<sub>6</sub>D<sub>5</sub>CD<sub>3</sub>, 90 °C

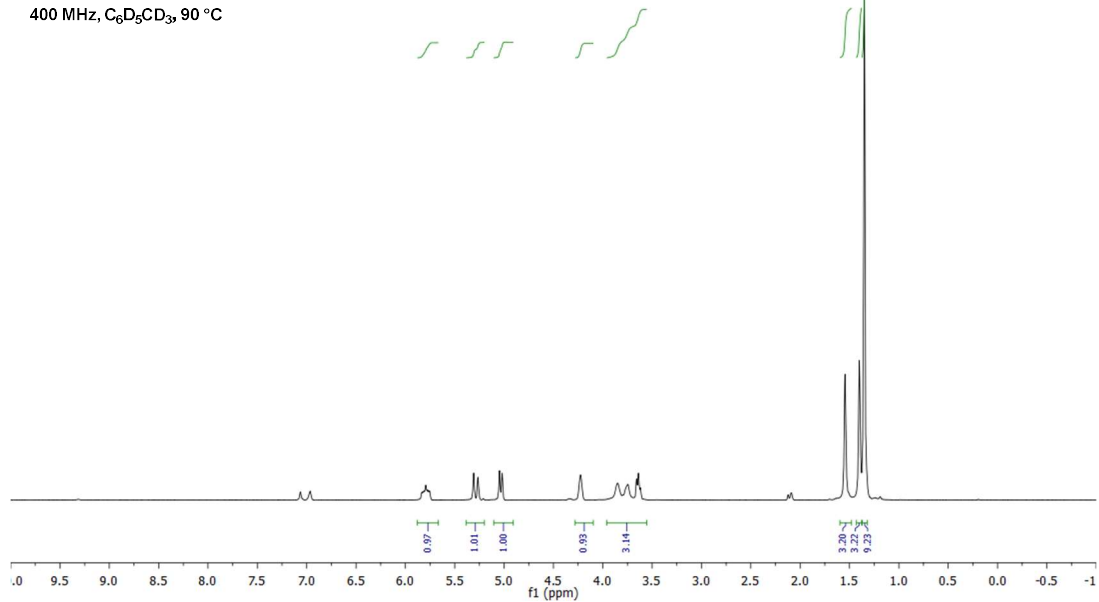

<sup>13</sup>C NMR of *N*-Boc-(*R*)-1-((*S*)-2,2-dimethyloxazolidin-4-yl)prop-2-en-1-ol (8)

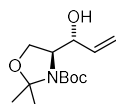

100 MHz, C<sub>6</sub>D<sub>5</sub>CD<sub>3</sub>, 90 °C

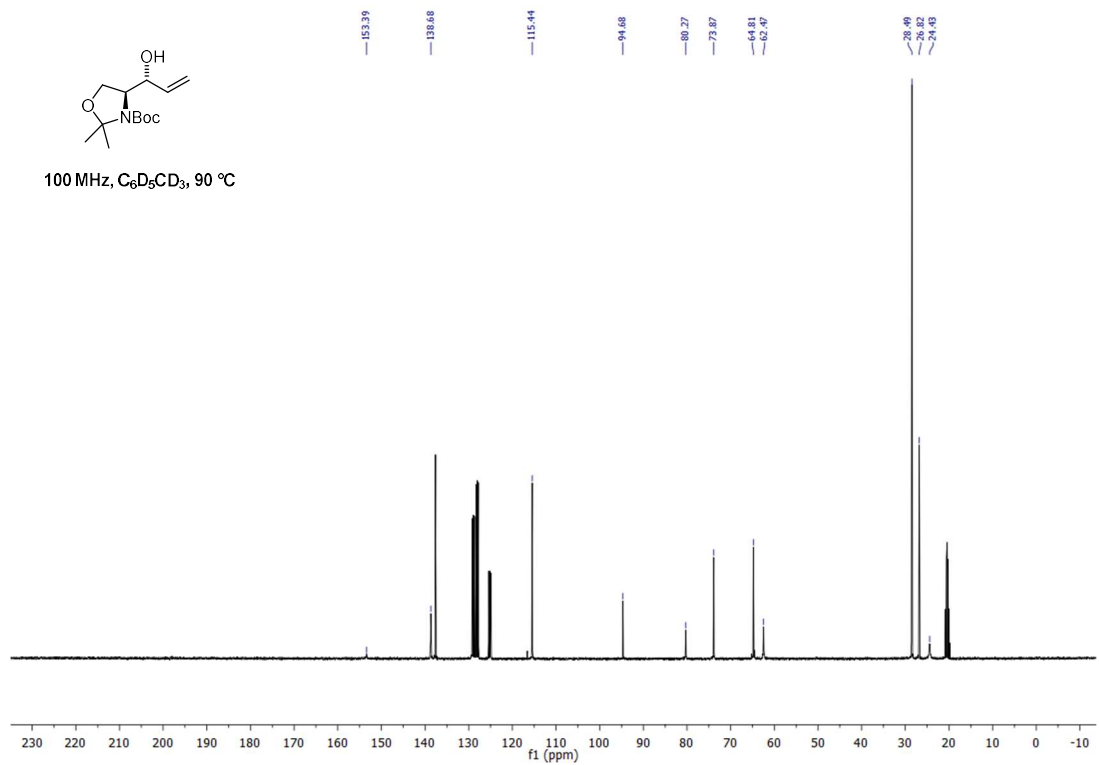



<sup>1</sup>H NMR of *N*-Boc-(*R,E*)-1-((*S*)-2,2-dimethyloxazolidin-4-yl)-3-((4-(4-propylphenyl)diazenyl)phenyl)prop-2-en-1-ol (9)

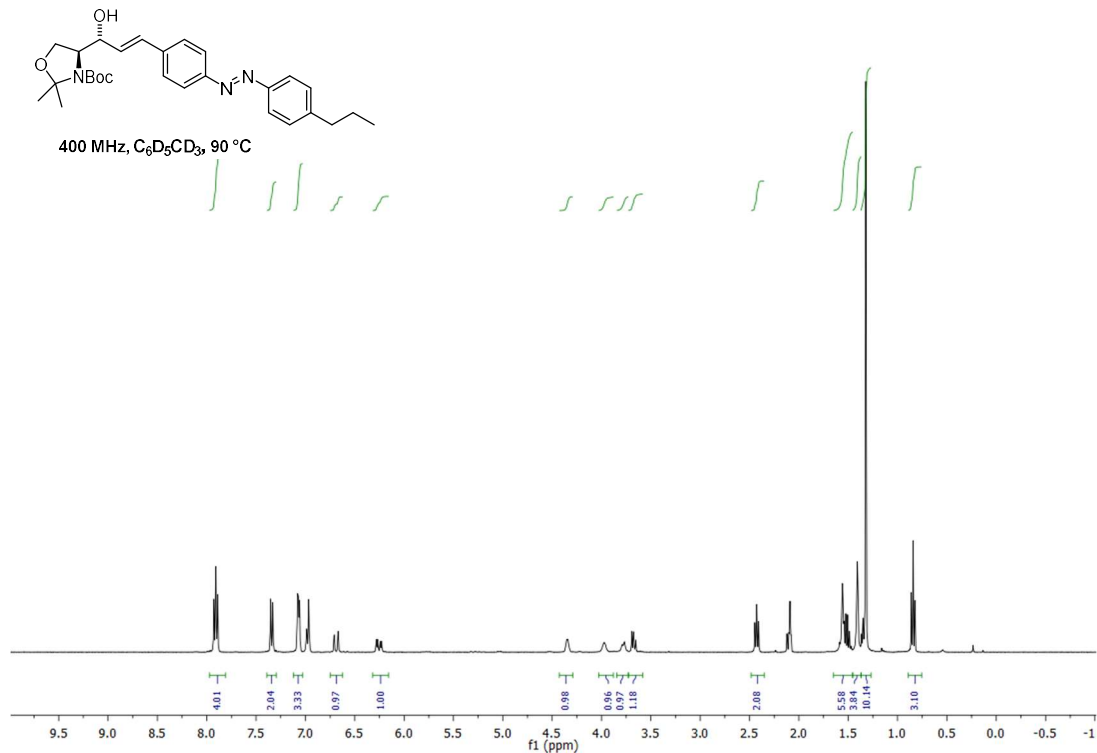

<sup>13</sup>C NMR of *N*-Boc-(*R,E*)-1-((*S*)-2,2-dimethyloxazolidin-4-yl)-3-((4-(4-propylphenyl)diazenyl)phenyl)prop-2-en-1-ol (9)

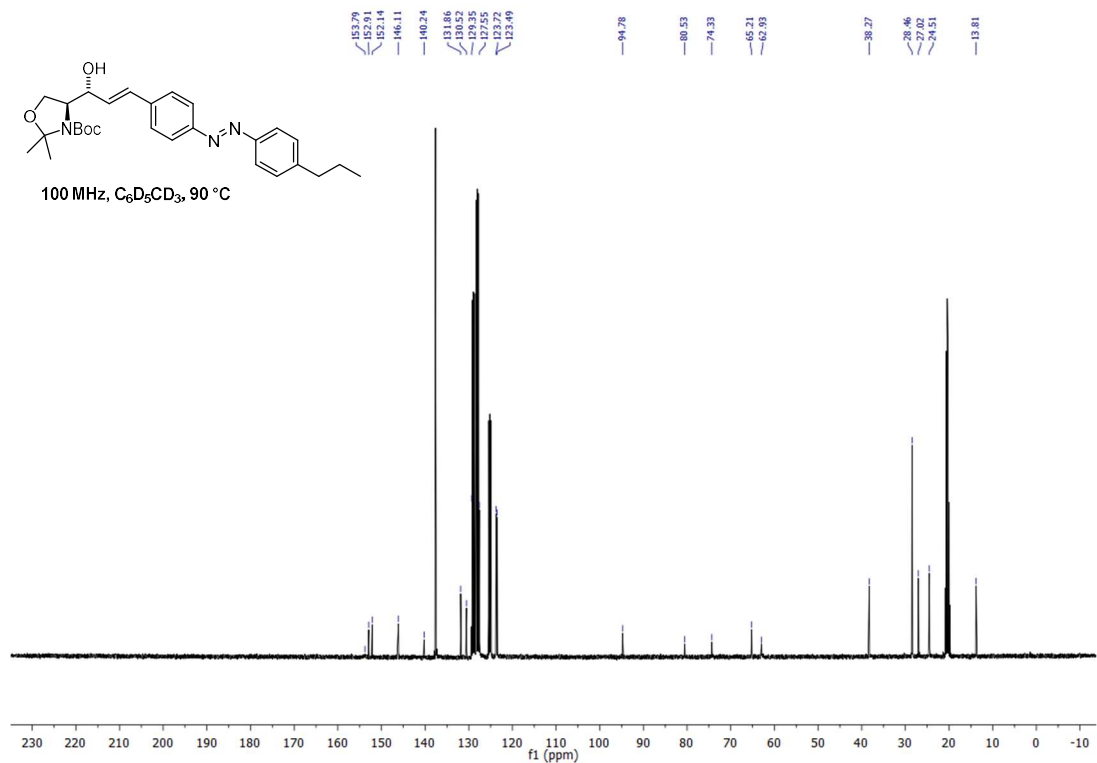

**<sup>1</sup>H NMR of (2*S*,3*R*,*E*)-2-amino-5-(4-((4-propylphenyl)diazenyl)phenyl) pent-4-ene-1,3-diol (aSph-1)**

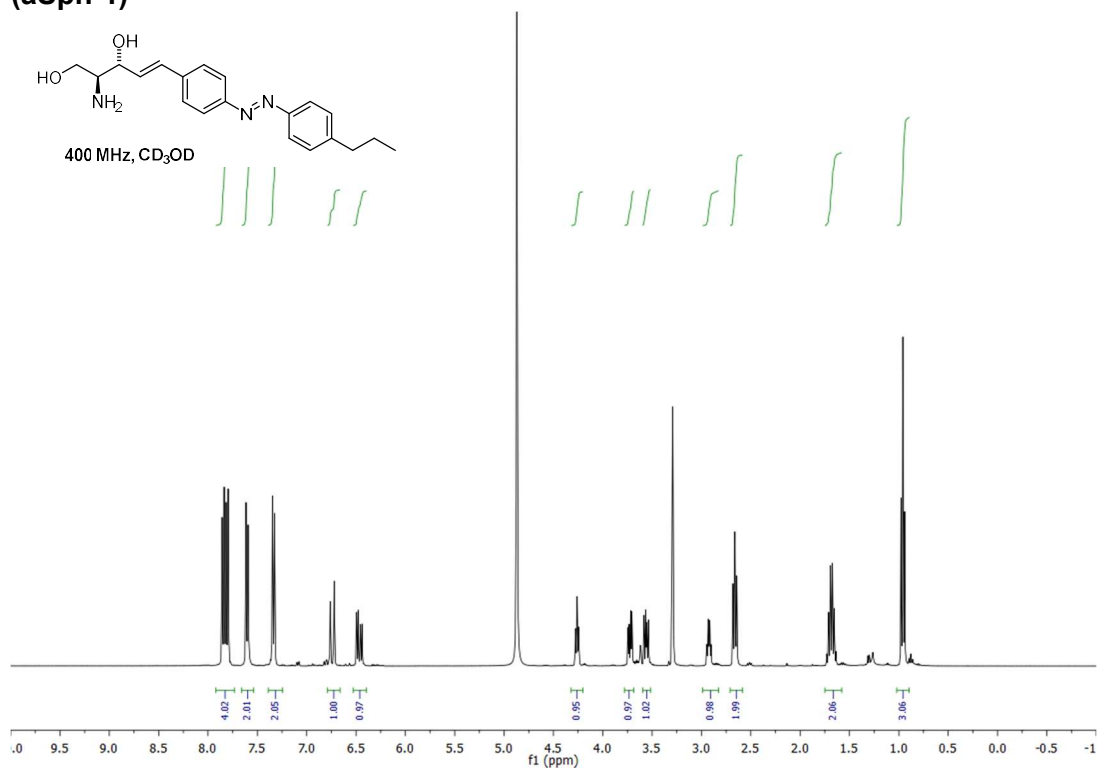

**<sup>13</sup>C NMR of (2*S*,3*R*,*E*)-2-amino-5-(4-((4-propylphenyl)diazenyl)phenyl) pent-4-ene-1,3-diol (aSph-1)**

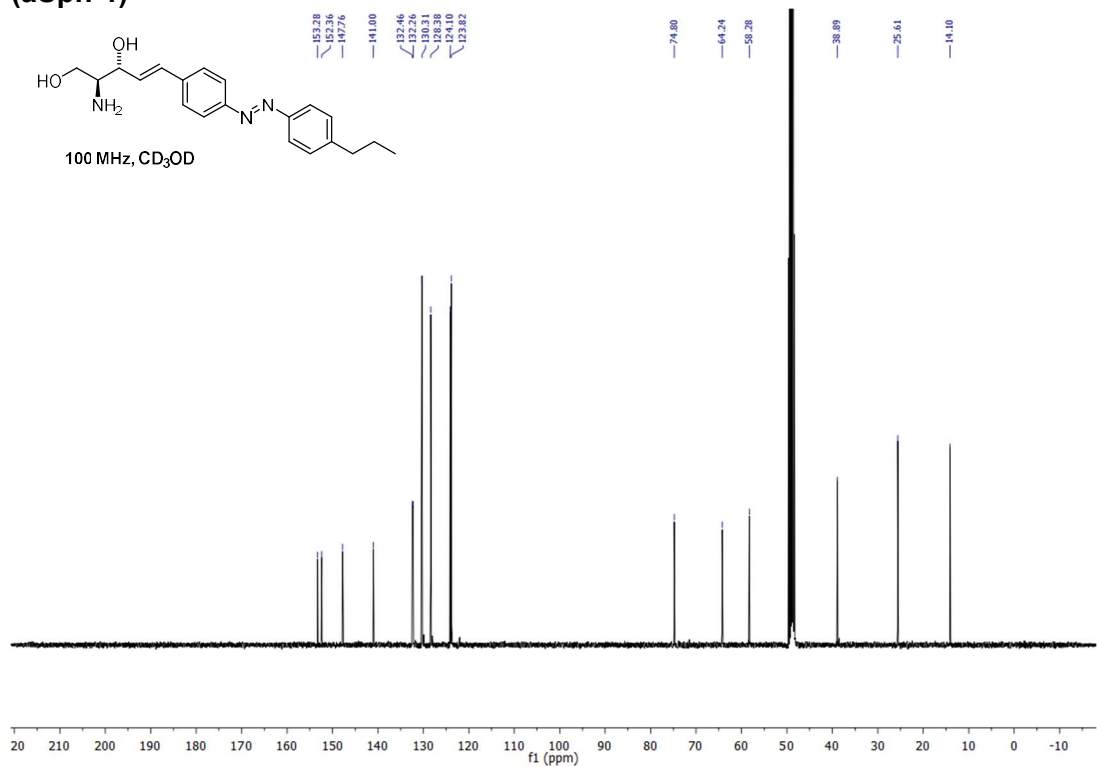

**<sup>1</sup>H NMR of *N*-((2*S*,3*R*,*E*)-1,3-dihydroxy-5-(4-((4-propylphenyl) diazenyl)phenyl)pent-4-en-2-yl)pentadec-14-ynamide (caCer-3)**

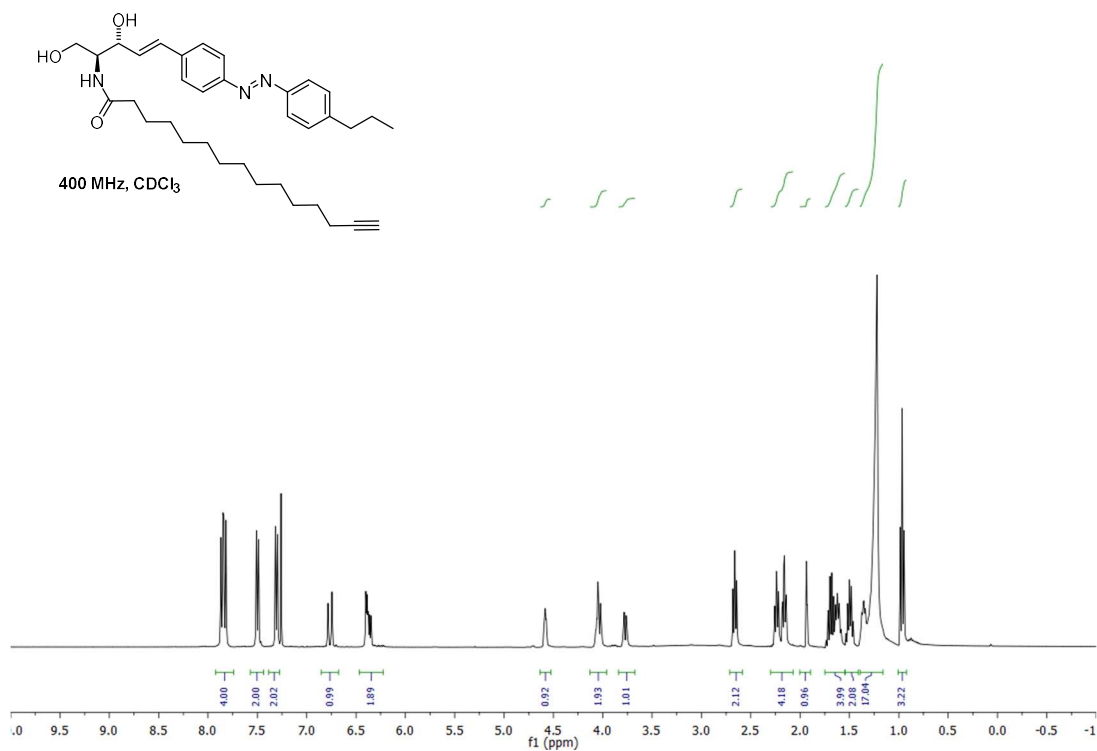

**<sup>13</sup>C NMR of *N*-((2*S*,3*R*,*E*)-1,3-dihydroxy-5-(4-((4-propylphenyl) diazenyl)phenyl)pent-4-en-2-yl)pentadec-14-ynamide (caCer-3)**

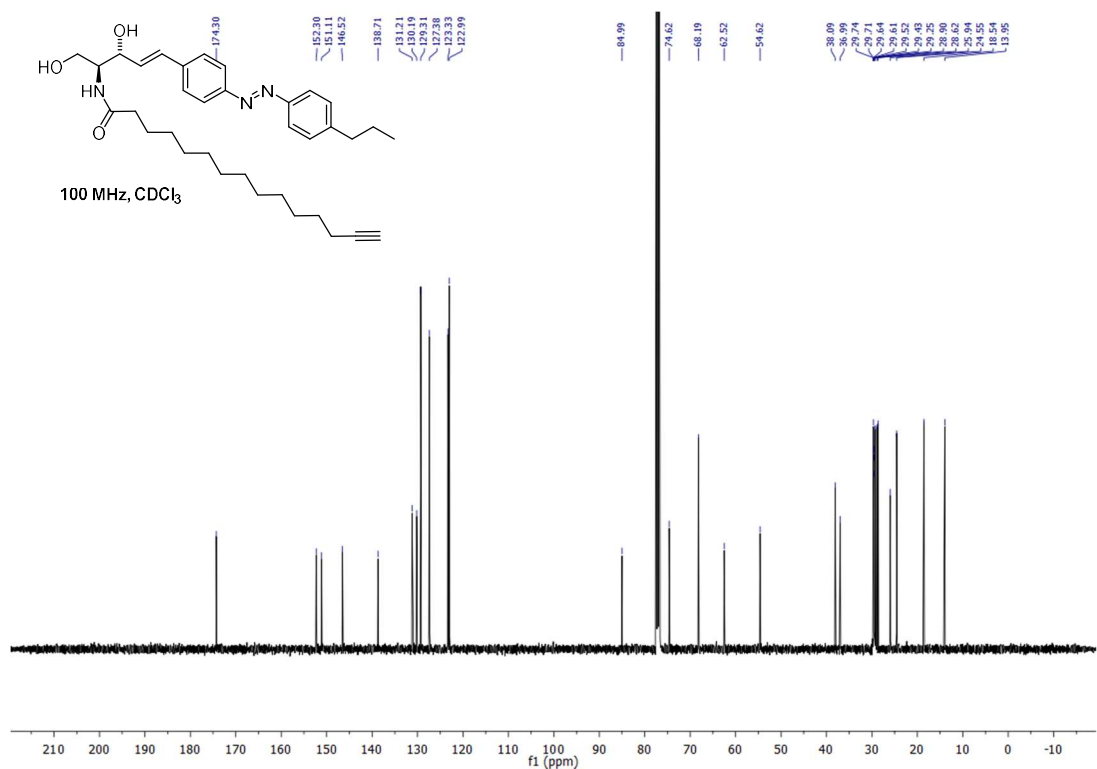

<sup>1</sup>H NMR of compound **N-Boc-(R,E)-1-((S)-2,2-dimethyloxazolidin-4-yl)-6-(4-(p-tolyldiazenyl)phenyl)hex-2-en-1-ol (S6)**

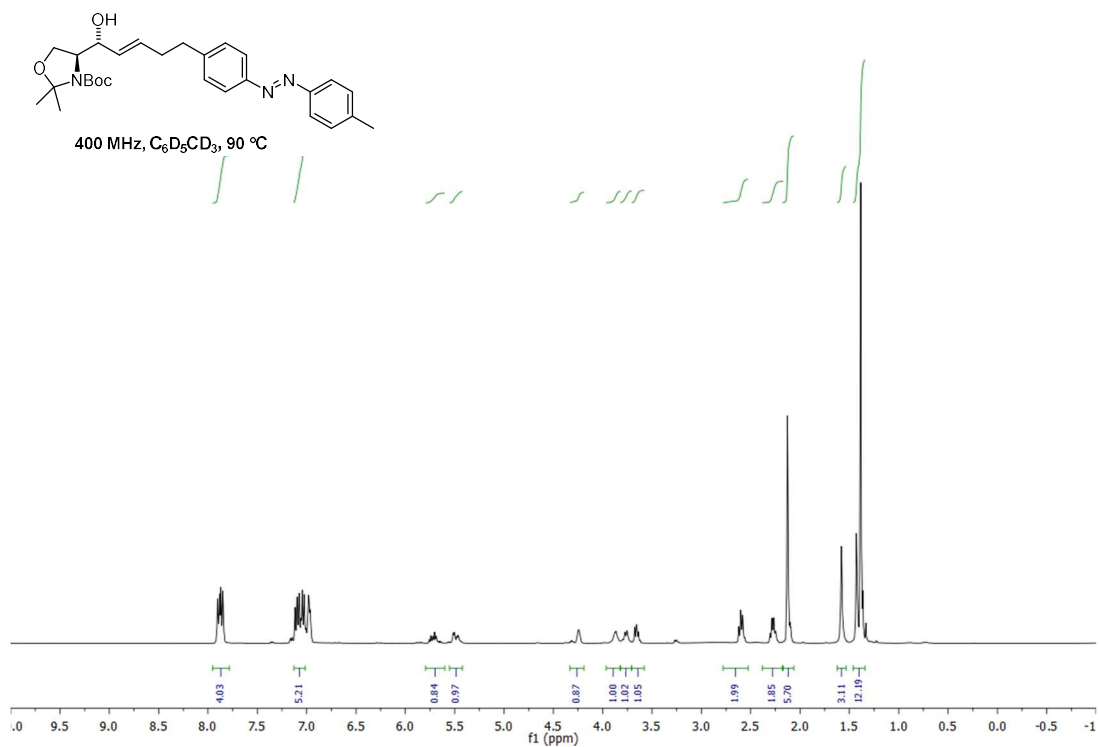

<sup>13</sup>C NMR of compound **N-Boc-(R,E)-1-((S)-2,2-dimethyloxazolidin-4-yl)-6-(4-(p-tolyldiazenyl)phenyl)hex-2-en-1-ol (S6)**

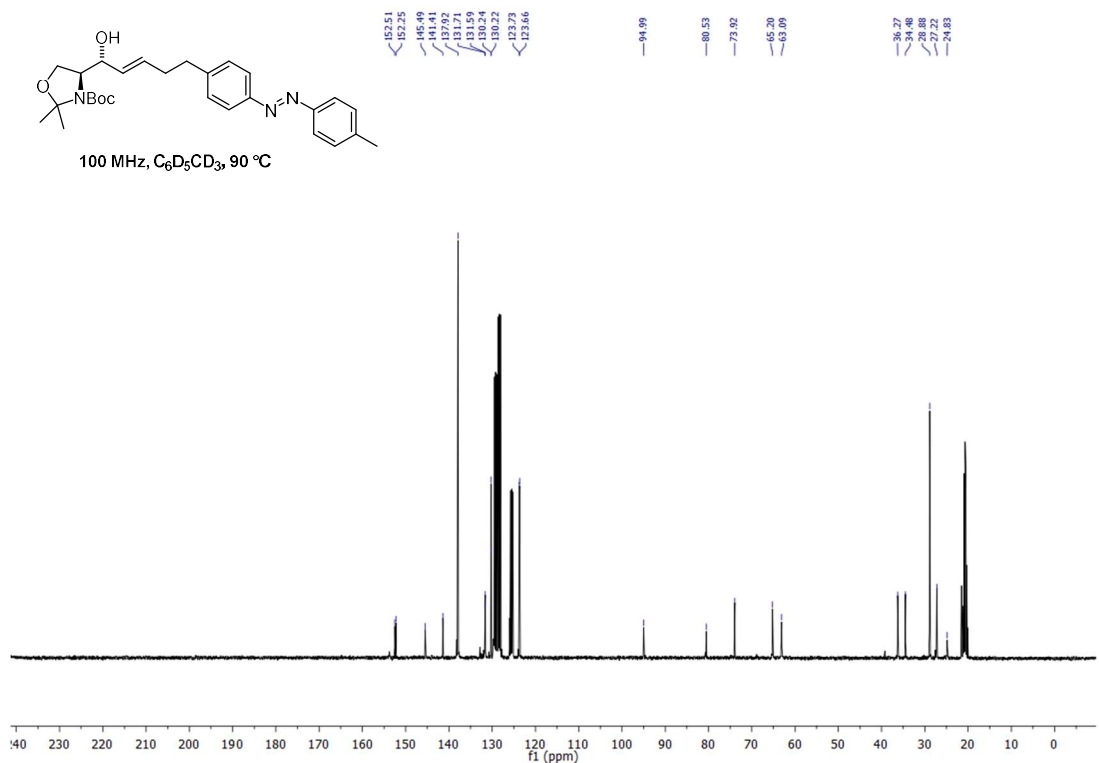

**<sup>1</sup>H NMR of (2*S*,3*R*,*E*)-2-amino-7-(4-(*p*-tolylidiazenyl)phenyl)hept-4-ene-1,3-diol (aSph-2)**

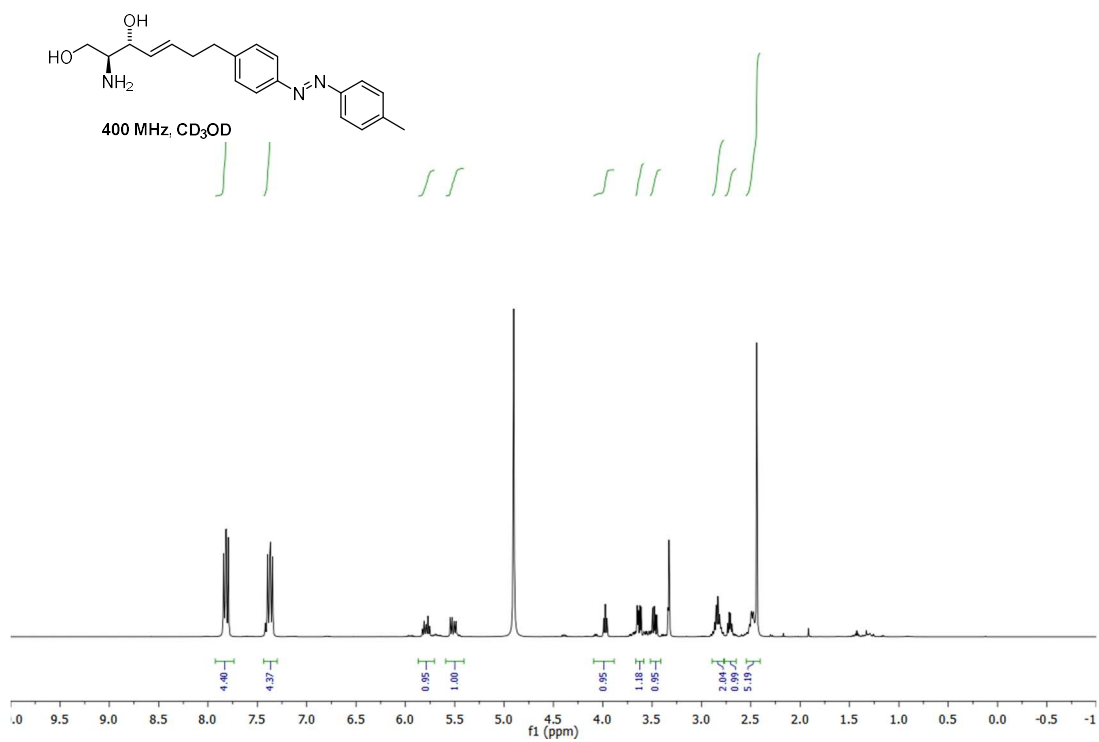

**<sup>13</sup>C NMR of (2*S*,3*R*,*E*)-2-amino-7-(4-(*p*-tolylidiazenyl)phenyl)hept-4-ene-1,3-diol (aSph-2)**

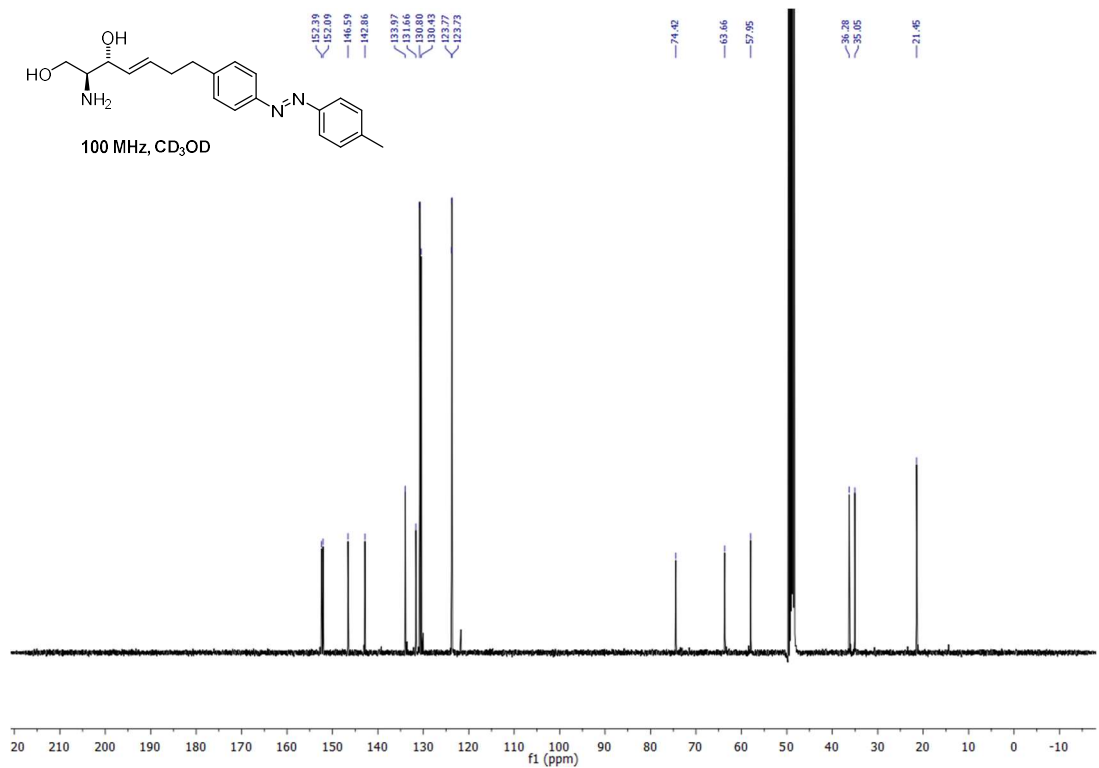

<sup>1</sup>H NMR of *N*-((2*S*,3*R*,*E*)-1,3-dihydroxy-7-(4-(*p*-tolyl diazenyl) phenyl)hept-4-en-2-yl)pentadec-14-ynamide (caCer-4)

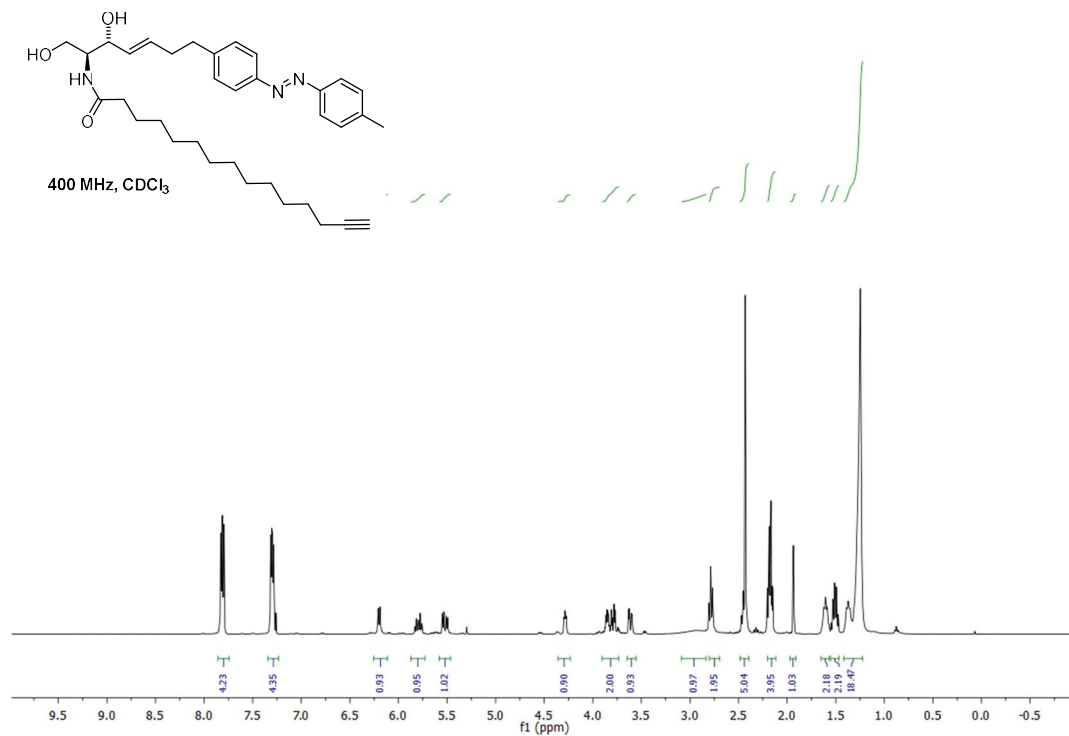

<sup>13</sup>C NMR of *N*-((2*S*,3*R*,*E*)-1,3-dihydroxy-7-(4-(*p*-tolyl diazenyl) phenyl)hept-4-en-2-yl)pentadec-14-ynamide (caCer-4)

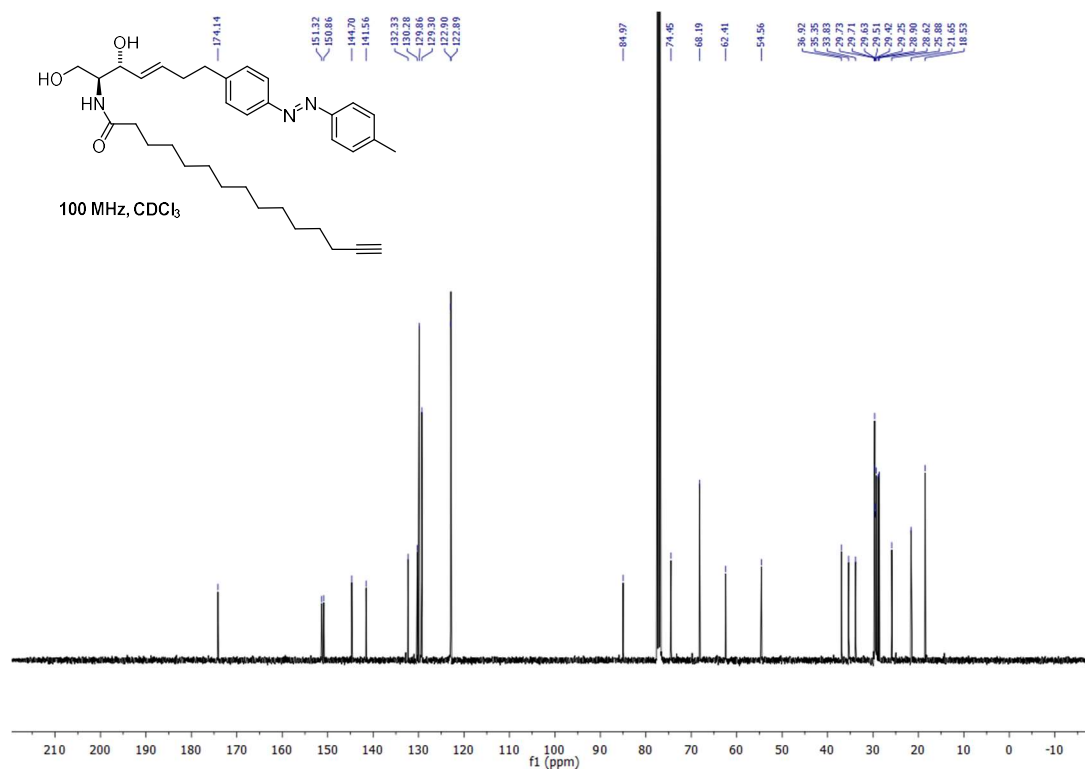

Supplement: elife-43230-supp1.pdf [file elife-43230-supp1.pdf]
